# Exploring the remarkable diversity of *Escherichia coli* Phages in the Danish Wastewater Environment, Including 91 Novel Phage Species

Nikoline S. Olsen<sup>1</sup>, Witold Kot<sup>1,2\*</sup> Laura M. F. Junco<sup>2</sup> and Lars H. Hansen<sup>1,2,\*</sup>

<sup>1</sup> Department of Environmental Science, Aarhus University, Frederiksborgvej 399, Roskilde, Denmark;  
niso@envs.au.dk

<sup>2</sup> Department of Plant and Environmental Sciences, University of Copenhagen, Thorvaldsensvej 40, 1871  
Frederiksberg C, Denmark; [lhha@plen.ku.dk](mailto:lhha@plen.ku.dk), [wk@plen.ku.dk](mailto:wk@plen.ku.dk)

\* Correspondence: [lhha@plen.ku.dk](mailto:lhha@plen.ku.dk) Phone: +45 28 75 20 53, [wk@plen.ku.dk](mailto:wk@plen.ku.dk) Phone: +45 35 33 38 77

**Funding:** This research was funded by Villum Experiment Grant 17595, Aarhus University Research Foundation  
AUFF Grant E-2015-FLS-7-28 to Witold Kot and Human Frontier Science Program RGP0024/2018.  
**Competing interests:** The authors declare no competing interests.

**Abstract:** Phages drive bacterial diversity - profoundly influencing diverse microbial communities, from microbiomes to the drivers of global biogeochemical cycling. The vast genomic diversity of phages is gradually being uncovered as >8000 phage genomes have now been sequenced. Aiming to broaden our understanding of *Escherichia coli* (MG1655, K-12) phages, we screened 188 Danish wastewater samples (0.5 ml) and identified 136 phages of which 104 are unique phage species and 91 represent novel species, including several novel lineages. These phages are estimated to represent roughly a third of the true diversity of *Escherichia* phages in Danish wastewater. The novel phages are remarkably diverse and represent four different families *Myoviridae*, *Siphoviridae*, *Podoviridae* and *Microviridae*. They group into 14 distinct clusters and nine singletons without any substantial similarity to other phages in the dataset. Their genomes vary drastically in length from merely 5 342 bp to 170 817 kb, with an impressive span of GC contents ranging from 35.3% to 60.0%. Hence, even for a model host bacterium, in the go-to source for phages, substantial diversity remains to be uncovered. These results expand and underlines the range of *Escherichia* phage diversity and demonstrate how far we are from fully disclosing phage diversity and ecology.

**Keywords:** bacteriophage; wastewater; *Escherichia coli*; diversity; genomics; taxonomy; coliphage

---

## 1. Introduction

Phages are important ecological contributors, they renew organic matter supplies in nutrient cycles and drive bacterial diversity by enabling co-existence of competing bacteria by “Killing the winner” and by serving as genomic reservoirs and transport units [1,2]. Phage genomes are known to entail auxiliary metabolism genes (AMGs), toxins, virulence factors and even antibiotic resistance genes [3–7] and through lysogeny and transduction they can transfer metabolic traits to their hosts and even confer immunity against homologous phages [1]. Still, in spite of their ecological role, potential as antimicrobials and the fact that they carry a multitude of unknown genes with great potential for biotechnological applications, phages are vastly understudied. Less than 9000 phage genomes have now been published, and though the number increases

rapidly, we may have merely scratched the surface of the expected diversity [8]. It has been estimated that at least a billion bacterial species exist [9], hence only phages targeting a tiny fraction of potential hosts have been reported. Efforts to disclose the range and diversity of phages targeting a single host, have revealed a stunning display of diversity. The most scrutinized phage host is the *Mycobacterium smegmatis*, for which the Science Education Alliance Phage Hunters program has isolated more than 4700 phages and fully sequenced 680 phages which represent 30 distinct phage clusters [10,11]. This endeavour has provided a unique insight into viral and host diversity, evolution and genetics [12–15]. No other phage host has been equally targeted, but *Escherichia coli* phages have been isolated in fairly high numbers. The International Committee on Taxonomy of Viruses (ICTV) has currently recognised 158 phage species originally isolated on *E. coli* [16], while 2732 *Escherichia* phage genomes have been deposited in GenBank [17]. As phages are expected to have an evolutionary potential to migrate across microbial populations, host species may not be an ideal indicator of relatedness, but it serves as an excellent starting point to explore phage diversity. Hierarchical classification of phages is complicated by the high degree of horizontal gene transfer, consequently several classification systems have been proposed [18–20], and we may not yet have reached a point where it is reasonable to establish the criteria for a universal system [20]. Nonetheless, a system enabling a mutual understanding and exchange of knowledge is needed. Accordingly, we have in this study chosen to classify our novel phages according to the ICTV guidelines [21].

Here we aim to expand our understanding of *Escherichia* phage diversity. Earlier studies are few, have relied on more laborious and time-consuming methods, or are based on *in silico* analyses of already published phage genomes [8]. Accordingly, Korf *et al.*, (2019) isolated 50 phages on 29 individual *E. coli* strains, while Jurczak-Kurek *et al.*, (2016) isolated 60 phages on a single *E. coli* strain, both finding a broad diversity of *Caudovirales* and also representatives of novel phage lineages [22,23]. We hypothesized, that a high-throughput screening of nearly 200 samples in time-series, using a single host, would expand the number of known phages by facilitating the interception of the prevailing phage(s) of the given day.

## 62 2. Materials and Methods

63 The screening for *Escherichia* phages was performed with the microplate based *High-throughput screening*  
 64 *method* as described in (not published). With the exception that lysates of wells giving rise to plaques were  
 65 sequenced without further purification. In short, an overnight enrichment was performed in microplates with  
 66 host culture, media and wastewater (0.5 ml per well), followed by filtration (0.45 µm), a purification step by  
 67 re-inoculation, a second overnight incubation and filtration (0.45µm), and then a spot-test (soft-agar overlay)  
 68 to indicate positive wells. All procedures were performed under sterile conditions.

### 69 2.1.1 Samples Bacteria and media

70 Inlet Wastewater samples (188) were collected (40-50 ml) in time-series (2-4 days spanning 1-3 weeks),  
 71 from 48 Danish wastewater treatment facilities (rural and urban) geographically distributed on Zealand,  
 72 Funen and in Jutland, during July and August 2017. The samples were centrifuged (9000 x g, 4 °C, 10 min) and  
 73 the supernatant filtered (0.45 µm) before storage in aliquots (-20°C) until screening. The host bacterium is *E.*  
 74 *coli* (MG1655, K-12), and the media Lysogeny Broth (LB), amended with CaCl<sub>2</sub> and MgCl<sub>2</sub> (final concentration  
 75 50 mM). Collected phages were stored in SM-buffer [24] at 4°C.

### 76 2.1.2 Sequencing and genomic characterisation

77 DNA extractions, clean-up (ZR-96 Clean and Concentrator kit, Zymo Research, Irvine, CA USA) and  
 78 sequencing libraries (Nextera® XT DNA kit, Illumina, San Diego, CA USA) were performed according to  
 79 manufacturer's protocol with minor modifications as described in Kot et al., (2014) [25]. The libraries were  
 80 sequenced as paired-end reads on an Illumina NextSeq platform with the Mid Output Kit v2 (300 cycles). The  
 81 obtained reads were trimmed and assembled in CLC Genomics Workbench version 10.1.1. (CLC BIO, Aarhus,  
 82 Denmark). Overlapping reads were merged with the following settings: mismatch cost: 2, minimum score: 15,  
 83 gap cost: 3 and maximum unaligned end mismatches: 0, and then assembled *de novo*. Additional control  
 84 assemblies were constructed using SPAdes version 3.12.0 [26]. Phage genomes were defined as contigs with

an average coverage  $> \times 20$  and a sequence length  $\geq 90\%$  of closest relative. Gene prediction and annotation were performed using a customized RASTtk version 2.0 [27] workflow with GeneMark [28], with manual curation and verification using BLASTP [29], HHpred [30] and Pfam version 32.0 [31], or de novo annotated using VIGA version 0.11.0 [32] based on DIAMOND searches (RefSeq Viral protein database) and HMMer searches (pVOG HMM database). All genomes were assessed for antibiotic resistance genes, bacterial virulence genes, type I, II, III and IV restriction modification (RM) genes and auxiliary metabolism genes (AMGs) using ResFinder 3.1 [33,34], VirulenceFinder 2.0 [35], Restriction-ModificationFinder 1.1 (REBASE) [36] and VIBRANT version 1.0.1 [37], respectively. The 104 unique phage genomes were aligned to viromes of BioProject PRJNA545408 in CLC Genomics Workbench and deposited in Genbank [17].

### 2.1.3 Genetic analyses

Nucleotide (NT) and amino acid (AA) similarities were calculated using tools recommended by the ICTV [38], i.e. BLAST [29] for identification of closest relative (BLASTn when possible, discontinuous megaBLAST (word size 16) for larger genomes) and Gegenees version 2.2.1 [39] for assessing phylogenetic distances of multiple genomes, for both NTs (BLASTn algorithm) and AAs (tBLASTx algorithm) a fragment size of 200 bp and step size 100 bp was applied. NT similarity was determined as percentage query cover multiplied by percentage NT identity. Novel phages are categorised according to ICTV taxonomy. The criterion of 95% DNA sequence similarity for demarcation of species was applied to identify novel species representatives and to determine uniqueness within the dataset. Evolutionary analyses for phylogenomic trees were conducted in MEGA7 version 2.1 (default settings) [40]. These were based on the large terminase subunit (*Caudovirales*), a gene commonly applied for phylogenetic analysis [41,42] and on the DNA replication gene (*gpA*) (*Microviridae*). The NT sequences were aligned by MUSCLE [43] and the evolutionary history inferred by the Maximum Likelihood method based on the Tamura-Nei model [44]. The trees with the highest log likelihood are shown. Pairwise whole genome comparisons were performed with Easyfig 2.2.2 [45] (BLASTn algorithm), these were curated by adding color-codes and identifiers in Inkscape version 0.92.2. The R package iNEXT [46,47] in

109 R studio version 1.1.456 [48] was used for rarefaction, species diversity ( $q = 0$ , datatype: incidence\_raw),  
 110 extrapolation hereof (estimatedD) and estimation of sample coverage. The visualisation of genome sizes and  
 111 GC contents was prepared in Excel version 16.31.

### 112 3. Results and Discussion

#### 113 3.2. Phylogenetics, taxonomy and species richness

114 The sequenced phages were analysed strictly *in silico*, focusing on their relatedness to known phages,  
 115 their taxonomy and any distinctive characteristics. Based on the confirmed morphology of closely related  
 116 phages, at least four different families are represented, *Myoviridae* (58%), *Siphoviridae* (25%), *Podoviridae* (7.4%)  
 117 and even the single stranded DNA (ssDNA) *Microviridae* (5.9%) (Table 1). Five (3.7%) of the phages are so  
 118 distinct that they could not with certainty be assigned to any family. A similar distribution was found by Korf  
 119 *et al.*, (2019), i.e. 70% *Myoviridae*, 22% *Siphoviridae* and 8% *Podoviridae*, just as an analysis of the genomes of  
 120 *Caudovirales* infecting *Enterobacteriaceae*, by Grose & Casjens (2014), also identified more clusters belonging to  
 121 the *Myoviridae*, than the *Siphoviridae* and fewest of the *Podoviridae* [8,22]. Jurczak-Kurek *et al.*, (2016) found more  
 122 siphoviruses than myovirus, but also found the *Podoviridae* to be the least abundant [23]. Nonetheless, these  
 123 distributions are just as likely to be caused by culture or isolation methods, as they are to reflect true  
 124 abundances. Based on DNA homology and phylogenetic analysis, the 104 unique phages identified in this  
 125 study group into 14 distinct clusters and nine singletons, having a <1% Gegenees score between clusters and  
 126 singletons, with the exceptions of *cluster IV*, *V* and *Jahat* which have inter-Gegenees scores of up to 20%, *cluster*  
 127 *IX*, *X* and *XI* which have inter-Gegenees scores of 1-8% and *cluster XIII*, *Sortsne* and *Sortkaff* which have inter-  
 128 Gegenees scores of 6-14% (Figure 1, Table 2). Excluding one phage in *cluster I* and two phages in *cluster XIV*,  
 129 the intra-Gegenees score of all clusters is above 39% (Figure 1).

130

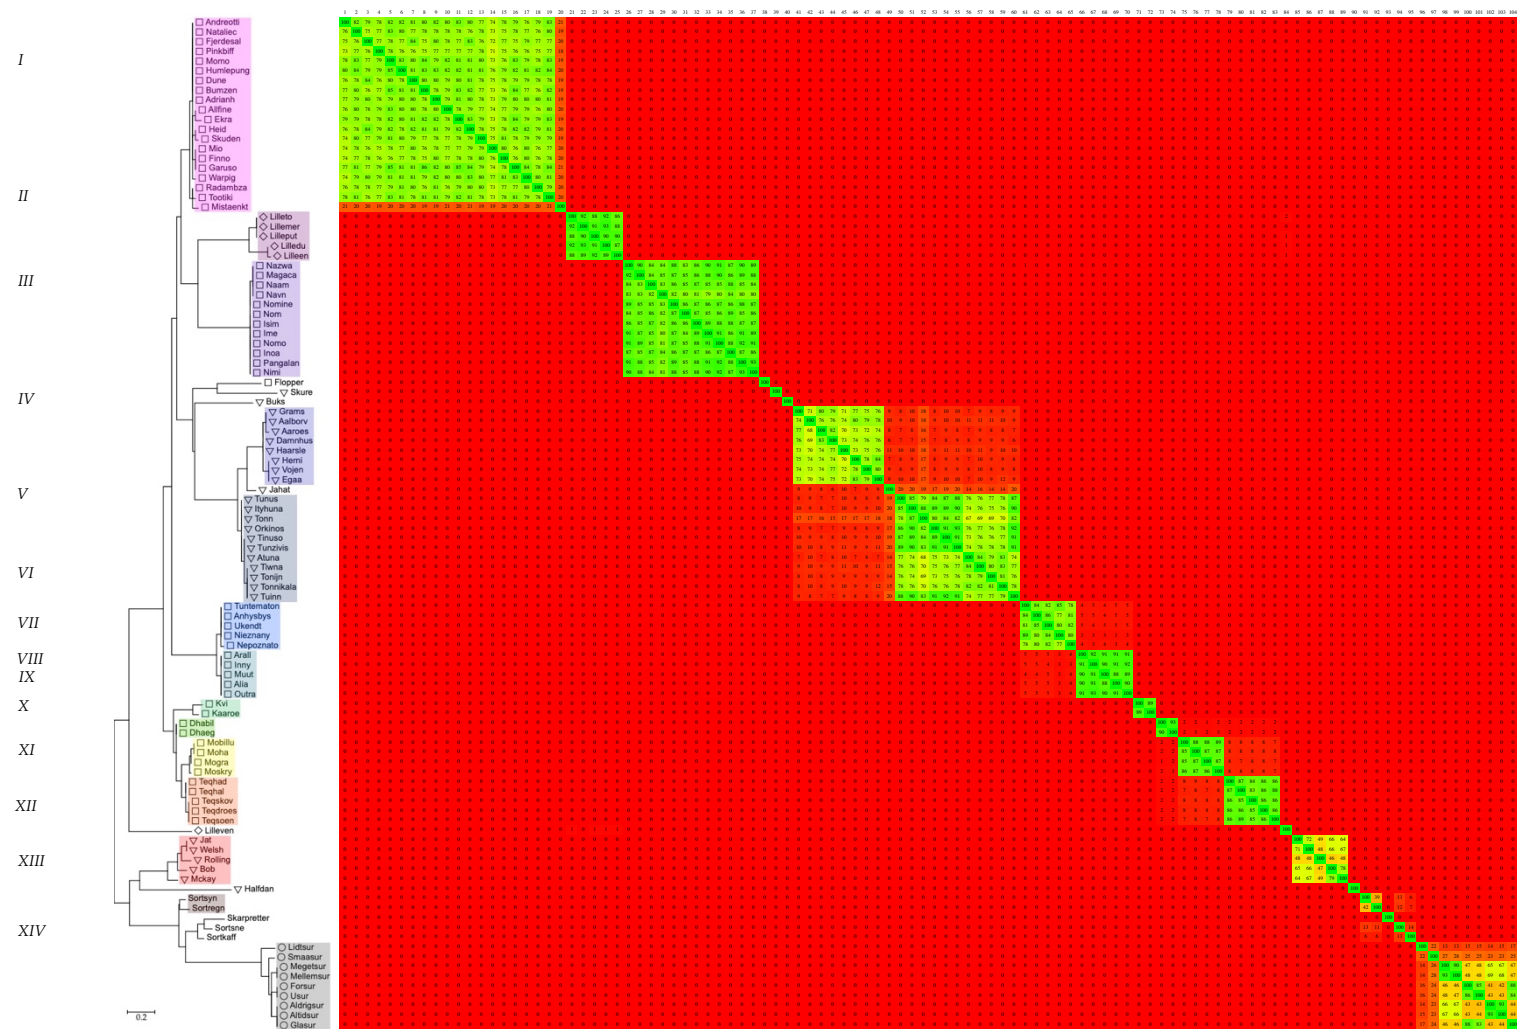

132 **Figure 1** Phylogenetic tree (Maximum log Likelihood: -1325.01, large terminase subunit (*Caudovirales*) or DNA replication protein *gpA* (*Microviridae*)), scalebar: substitutions  
133 per site, morphology is indicated by symbols (*Myoviridae*: □, *Siphoviridae*: ▽, *Podoviridae*: ○, *Microviridae*: ◇) and phylogenomic nucleotide distances (Gegenes, BLASTn:  
134 fragment size: 200, step size: 100, threshold: 0%)

**Table 1** List of 104 unique *Escherichia* phages identified in 94 Danish wastewater samples. Novelty (\*) is based on the 95% demarcation of species. Similarity is sequence identity (%) times sequence coverage (%) to closest related (Blastn). Taxonomy is based on similarity (BLASTn) to closest related and the ICTV Master Species list.

| Escherichia<br>Phage | Genome<br>(bp) | ORFs<br>(n) | tRNAs<br>(n) | GC<br>(%) | Novel | Sample                      | Location                                           | Cluster | Taxonomy              | Similarity<br>(%) | Accession<br>number |
|----------------------|----------------|-------------|--------------|-----------|-------|-----------------------------|----------------------------------------------------|---------|-----------------------|-------------------|---------------------|
| Tootiki              | 88257          | 128         | 22           | 39        | *     | 3D                          | Avedøre                                            | I       | <i>Felixounavirus</i> | 90,2              | MN850647            |
| Mio                  | 83431          | 121         | 18           | 39,1      | *     | 13C                         | Hadsten                                            | I       | <i>Felixounavirus</i> | 89,7              | MN850631            |
| Allfine              | 86963          | 125         | 20           | 39        | *     | 14A                         | Hammel                                             | I       | <i>Felixounavirus</i> | 91,2              | MN850633            |
| Bumzen               | 87360          | 126         | 20           | 39,1      | *     | 14B, 14D, 15A               | Hammel, Hinnerup                                   | I       | <i>Felixounavirus</i> | 92,5              | MN850635            |
| Dune                 | 88511          | 129         | 20           | 39        | *     | 19C                         | Tørring                                            | I       | <i>Felixounavirus</i> | 91,5              | MN850636            |
| Warpig               | 86106          | 127         | 17           | 39        | *     | 20A                         | Helsingør                                          | I       | <i>Felixounavirus</i> | 93                | MN850637            |
| Radambza             | 86702          | 127         | 19           | 38,9      | *     | 20D                         | Helsingør                                          | I       | <i>Felixounavirus</i> | 91,6              | MN850639            |
| Ekra                 | 87282          | 128         | 20           | 38,9      | *     | 21C                         | Herning                                            | I       | <i>Felixounavirus</i> | 92,9              | MN850644            |
| Humlepung            | 85311          | 119         | 19           | 39,1      | *     | 12B, 25B, 37A               | Drøbro, Gram, Bogense                              | I       | <i>Felixounavirus</i> | 92,1              | MN850564            |
| Finno                | 87554          | 129         | 20           | 38,9      | *     | 31C                         | Skovby                                             | I       | <i>Felixounavirus</i> | 89,7              | MN850619            |
| Garuso               | 85798          | 130         | 20           | 38,9      | *     | 29A, 33A                    | Nustrup, Sommersted                                | I       | <i>Felixounavirus</i> | 90,9              | MN850566            |
| Momo                 | 88168          | 130         | 20           | 39        | *     | 38D                         | Hofmangave                                         | I       | <i>Felixounavirus</i> | 90,7              | MN850580            |
| Heid                 | 87590          | 126         | 20           | 39        | *     | 8C, 24B, 24C, 34D, 37D, 38B | Esbjerg Ø, Bevtøft, Vojens, Bogense,<br>Hofmangave | I       | <i>Felixounavirus</i> | 91,2              | MN850577            |
| Skuden               | 87263          | 131         | 20           | 38,9      | *     | 41D                         | Odense NV                                          | I       | <i>Felixounavirus</i> | 91,1              | MN850585            |
| Pinkbiff             | 88814          | 129         | 20           | 39        | *     | 46A                         | Marselisborg                                       | I       | <i>Felixounavirus</i> | 93,9              | MN850603            |
| Fjerdesal            | 87715          | 128         | 21           | 39        | *     | 3A, 39A, 46C                | Avedøre, Hårslev, Marselisborg                     | I       | <i>Felixounavirus</i> | 90,6              | MN850605            |
| Andreotti            | 83391          | 117         | 20           | 39,2      | *     | 47B                         | Egå                                                | I       | <i>Felixounavirus</i> | 91,9              | MN850610            |
| Nataliec             | 89137          | 134         | 20           | 39        | *     | 47D, 48C                    | Egå, Viby                                          | I       | <i>Felixounavirus</i> | 90,3              | MN850611            |
| Adrianh              | 88226          | 128         | 19           | 38,9      | *     | 42C, 48B                    | Otterup, Viby                                      | I       | <i>Felixounavirus</i> | 91,1              | MN850614            |

| Escherichia<br>Phage | Genome<br>(bp) | ORFs<br>(n) | tRNAs<br>(n) | GC<br>(%) | Novel | Sample             | Location               | Cluster | Taxonomy             | Similarity<br>(%) | Accession<br>number |
|----------------------|----------------|-------------|--------------|-----------|-------|--------------------|------------------------|---------|----------------------|-------------------|---------------------|
| Mistaenkt            | 86664          | 128         | 22           | 47,2      | *     | 6A                 | Kolding                | I       | <i>Suspvirus</i>     | 91,1              | MN850587            |
| Nimi                 | 137039         | 213         | 5            | 43,7      | *     | 11C                | Varde                  | III     | <i>Vequintavirus</i> | 93,3              | MN850626            |
| Navn                 | 141707         | 224         | 4            | 43,6      | *     | 21B                | Herning                | III     | <i>Vequintavirus</i> | 91,1              | MN850642            |
| Nomine               | 137991         | 220         | 5            | 43,6      | *     | 23A                | Lemvig                 | III     | <i>Vequintavirus</i> | 91,5              | MN850649            |
| Naswa                | 138583         | 222         | 5            | 43,6      | *     | 45A                | Ålborg Ø               | III     | <i>Vequintavirus</i> | 93,1              | MN850595            |
| naam                 | 137129         | 215         | 5            | 43,7      |       | 31D                | Skovby                 | III     | <i>Vequintavirus</i> | 94,5              | MN850630            |
| Ime                  | 137114         | 217         | 5            | 43,6      | *     | 12C, 36B           | Drøsbo                 | III     | <i>Vequintavirus</i> | 93,1              | MN850576            |
| Magaca               | 135826         | 217         | 5            | 43,6      |       | 48A                | Viby                   | III     | <i>Vequintavirus</i> | 96                | MN850612            |
| Nom                  | 136114         | 213         | 5            | 43,6      | *     | 28D                | Jegerup                | III     | <i>Vequintavirus</i> | 92,6              | MN850646            |
| Isim                 | 138289         | 219         | 5            | 43,6      | *     | 31B                | Skovby                 | III     | <i>Vequintavirus</i> | 93,8              | MN850597            |
| Nomo                 | 137702         | 218         | 5            | 43,7      | *     | 38D                | Hofmansgave            | III     | <i>Vequintavirus</i> | 93,3              | MN850578            |
| Inoa                 | 138710         | 220         | 5            | 43,6      | *     | 44C                | Ålborg V               | III     | <i>Vequintavirus</i> | 92                | MN850593            |
| Pangalan             | 136944         | 215         | 5            | 43,7      |       | 2A, 45D, 48D       | Grindsted, Egå, Viby   | III     | <i>Vequintavirus</i> | 94,8              | MN850627            |
| Tuntematon           | 150473         | 279         | 11           | 39,1      | *     | 7B, 7C             | Esbjerg V              | VI      | <i>Myoviridae</i>    | 89,6              | MN850618            |
| Anhysbys             | 149335         | 271         | 11           | 39,1      | *     | 22C                | Hillerød               | VI      | <i>Myoviridae</i>    | 91,5              | MN850648            |
| Ukendt               | 150947         | 266         | 11           | 39        | *     | 32D                | Skrydstrup             | VI      | <i>Myoviridae</i>    | 88,7              | MN850565            |
| Nepoznato            | 151514         | 265         | 10           | 38,9      | *     | 19D, 35A, 48A, 48D | Tørring, Årøsund, Viby | VI      | <i>Myoviridae</i>    | 85,6              | MN850571            |
| Nieznany             | 144998         | 254         | 11           | 39,1      | *     | 45C                | Ålborg Ø               | VI      | <i>Myoviridae</i>    | 88,9              | MN850598            |
| Muut                 | 146307         | 243         | 13           | 37,4      | *     | 35B                | Årøsund                | VII     | <i>Myoviridae</i>    | 92                | MN850573            |
| Alia                 | 147009         | 246         | 13           | 37,5      | *     | 13D                | Hadsten                | VII     | <i>Myoviridae</i>    | 93,1              | MN850632            |
| Outra                | 145482         | 246         | 13           | 37,4      | *     | 22A                | Hillerød               | VII     | <i>Myoviridae</i>    | 93,8              | MN850645            |
| Inny                 | 147483         | 247         | 13           | 37,4      | *     | 45D                | Ålborg Ø               | VII     | <i>Myoviridae</i>    | 92,4              | MN850601            |
| Arall                | 145715         | 242         | 13           | 37,4      |       | 41B                | Odense NØ              | VII     | <i>Myoviridae</i>    | 94,6              | MN850584            |
| Kvi                  | 163673         | 266         | -            | 40,5      | *     | 48C                | Viby                   | VIII    | <i>Krischvirus</i>   | 94,2              | MN850615            |
| Kaaro                | 163719         | 267         | -            | 40,5      |       | 35D                | Årøsund                | VIII    | <i>Krischvirus</i>   | 94,7              | MN850574            |

| Escherichia | Genome | ORFs | tRNAs | GC   | Novel | Sample   | Location              | Cluster | Taxonomy              | Similarity | Accession |
|-------------|--------|------|-------|------|-------|----------|-----------------------|---------|-----------------------|------------|-----------|
| Phage       | (bp)   | (n)  | (n)   | (%)  |       |          |                       |         |                       | (%)        | number    |
| Dhabil      | 165644 | 266  | 3     | 39,5 | *     | 1B       | Billund               | IX      | <i>Dhakavirus</i>     | 87,5       | MN850621  |
| Dhaeg       | 170817 | 278  | 3     | 39,4 | *     | 47A, 47C | Egå                   | IX      | <i>Dhakavirus</i>     | 87,4       | MN850609  |
| Mogra       | 168724 | 263  | 2     | 37,7 | *     | 25C      | Gram                  | X       | <i>Mosigvirus</i>     | 91,1       | MN850579  |
| Mobillu     | 163063 | 255  | 2     | 37,7 |       | 1B       | Billund               | X       | <i>Mosigvirus</i>     | 94,5       | MN850622  |
| Moha        | 168676 | 267  | 2     | 37,6 |       | 26A      | Haderslev             | X       | <i>Mosigvirus</i>     | 94,8       | MN850590  |
| Moskry      | 169410 | 269  | 2     | 37,6 | *     | 32C      | Skrydstrup            | X       | <i>Mosigvirus</i>     | 93,2       | MN850651  |
| Teqskov     | 165017 | 257  | 6     | 35,4 | *     | 10D      | Skovlund              | XI      | <i>Tequatrovirus</i>  | 91,7       | MN895437  |
| Teqdroes    | 166833 | 269  | 10    | 35,4 | *     | 12D      | Drøbro                | XI      | <i>Tequatrovirus</i>  | 88,6       | MN895438  |
| Teqhad      | 167892 | 270  | 10    | 35,3 | *     | 26B      | Haderslev             | XI      | <i>Tequatrovirus</i>  | 90,1       | MN895434  |
| Teqhal      | 168070 | 266  | 11    | 35,4 | *     | 27A, 27D | Halk                  | XI      | <i>Tequatrovirus</i>  | 93,9       | MN895435  |
| Teqsoen     | 166468 | 268  | 10    | 35,5 | *     | 43B      | Søndersø              | XI      | <i>Tequatrovirus</i>  | 91,7       | MN895436  |
| Flopper     | 52092  | 78   | 1     | 44,2 | *     | 44D      | Ålborg V              | -       | <i>Myoviridae</i>     | 87         | MN850594  |
| Damhaus     | 51154  | 89   | -     | 44,1 | *     | 4B       | Damhusåen             | IV      | <i>Hanriverivirus</i> | 85,8       | MN850602  |
| Herni       | 50971  | 89   | -     | 44,1 | *     | 21B, 30D | Herning, Over Jerstal | IV      | <i>Hanriverivirus</i> | 87,6       | MN850640  |
| Grams       | 49530  | 83   | -     | 44,1 | *     | 25B      | Gram                  | IV      | <i>Hanriverivirus</i> | 87,1       | MN850567  |
| Aaroes      | 51662  | 92   | -     | 44,1 | *     | 35B      | Årøsund               | IV      | <i>Hanriverivirus</i> | 83         | MN850572  |
| Aalborv     | 46660  | 79   | -     | 43,9 | *     | 44B      | Ålborg V              | IV      | <i>Hanriverivirus</i> | 86,9       | MN850591  |
| Haarsle     | 48613  | 85   | -     | 44   | *     | 39B, 45C | Hårslev, Ålborg Ø     | IV      | <i>Hanriverivirus</i> | 87,1       | MN850600  |
| Egaa        | 51643  | 87   | -     | 44,1 | *     | 47A      | Egå                   | IV      | <i>Hanriverivirus</i> | 89,7       | MN850607  |
| Vojen       | 50709  | 86   | -     | 44,1 | *     | 34B      | Vojens                | IV      | <i>Hanriverivirus</i> | 89,7       | MN850569  |
| Tiwna       | 51014  | 85   | -     | 44,6 | *     | 21B      | Herning               | V       | <i>Tunavirinae</i>    | 87,2       | MN850643  |
| Tonijn      | 51627  | 86   | -     | 44,6 | *     | 32B, 32C | Skrydstrup            | V       | <i>Tunavirinae</i>    | 88,4       | MN850641  |
| Tonnikala   | 51277  | 86   | -     | 44,8 | *     | 48A      | Viby                  | V       | <i>Tunavirinae</i>    | 86,4       | MN850613  |
| Atuna       | 50732  | 88   | -     | 44,6 | *     | 7B       | Esbjerg V             | V       | <i>Tunavirinae</i>    | 84,9       | MN850620  |
| Tunus       | 51111  | 87   | -     | 44,8 | *     | 20A      | Helsingør             | V       | <i>Tunavirinae</i>    | 93,7       | MN850638  |

| Escherichia<br>Phage | Genome<br>(bp) | ORFs<br>(n) | tRNAs<br>(n) | GC<br>(%) | Novel | Sample        | Location            | Cluster | Taxonomy             | Similarity<br>(%) | Accession<br>number |
|----------------------|----------------|-------------|--------------|-----------|-------|---------------|---------------------|---------|----------------------|-------------------|---------------------|
| Orkinos              | 49798          | 81          | -            | 44,6      | *     | 30B, 30D      | Over Jerstal        | V       | <i>Tunavirinae</i>   | 91,3              | MN850586            |
| Ityhuna              | 50768          | 86          | -            | 44,7      | *     | 39D           | Hårslev             | V       | <i>Tunavirinae</i>   | 93,3              | MN850582            |
| Tonn                 | 51012          | 87          | -            | 44,5      | *     | 8C, 45C       | Esbjerg Ø, Ålborg Ø | V       | <i>Tunavirinae</i>   | 94                | MN850596            |
| Tinuso               | 50856          | 86          | -            | 44,8      |       | 14A           | Hammel              | V       | <i>Tunavirinae</i>   | 97,3              | MN850634            |
| Tunzivis             | 50596          | 84          | -            | 44,6      |       | 46B           | Marselisborg        | V       | <i>Tunavirinae</i>   | 94,5              | MN850604            |
| Tuinn                | 50505          | 86          | -            | 44,7      |       | 46D           | Marselisborg        | V       | <i>Tunavirinae</i>   | 94,8              | MN850606            |
| Jahat                | 51101          | 87          | -            | 45,7      | *     | 35A           | Vojens              | -       | <i>Tunavirinae</i>   | 68,5              | MK552105            |
| Bob                  | 45252          | 63          | -            | 54,5      | *     | 12C           | Drøsbro             | XII     | <i>Dhillonvirus</i>  | 88,6              | MN850628            |
| Mckay                | 44443          | 63          | -            | 54,5      | *     | 13B           | Hadsten             | XII     | <i>Dhillonvirus</i>  | 83,8              | MN850629            |
| Jat                  | 44417          | 63          | -            | 54,5      | *     | 23C           | Lemvig              | XII     | <i>Dhillonvirus</i>  | 89,4              | MN850650            |
| Rolling              | 46017          | 64          | -            | 54,2      | *     | 29D           | Nustrup             | XII     | <i>Dhillonvirus</i>  | 80,2              | MN850575            |
| Welsh                | 45207          | 62          | -            | 54,6      | *     | 23A, 43D      | Lemvig, Sønder sø   | XII     | <i>Dhillonvirus</i>  | 83,8              | MN850589            |
| Buks                 | 40308          | 62          | -            | 49,7      | *     | 1A            | Billund             | -       | <i>Jerseyvirus</i>   | 91,3              | MN850616            |
| Skure                | 59474          | 92          | -            | 44,6      | *     | 23C           | Lemvig              | -       | <i>Seuratvirus</i>   | 90,4              | MK672798            |
| Halfdan              | 42858          | 57          | -            | 53,7      | *     | 34D           | Vojens              | -       | <i>Siphoviridae</i>  | 28,8              | MH362766            |
| Lilleen              | 5342           | 6           | -            | 46,9      | *     | 33A           | Sommersted          | II      | <i>Gequatrovirus</i> | 93,8              | MK629526            |
| Lilleput             | 5490           | 6           | -            | 47        | *     | 12D           | Drøsbro             | II      | <i>Gequatrovirus</i> | 93,4              | MK629525            |
| Lilleto              | 5492           | 6           | -            | 46,8      | *     | 43C, 43D, 44B | Sønder sø, Ålborg V | II      | <i>Gequatrovirus</i> | 92,7              | MK629529            |
| Lilledu              | 5483           | 6           | -            | 47,2      | *     | 25C           | Gram                | II      | <i>Gequatrovirus</i> | 92,6              | MK791318            |
| Lillemer             | 5492           | 6           | -            | 47,1      |       | 45C           | Ålborg Ø            | II      | <i>Gequatrovirus</i> | 94,5              |                     |
| Lilleven             | 6090           | 9           | -            | 44,4      | *     | 11B           | Varde               | -       | <i>Alphatrevirus</i> | 93,9              | MK629527            |
| Sortsyn              | 42116          | 61          | -            | 59        | *     | 11B           | Varde               | XIII    | <i>Unclassified</i>  | 92,3              | MN850623            |
| Sortregn             | 38200          | 53          | -            | 59,3      |       | 43D           | Sønder sø           | XIII    | <i>Unclassified</i>  | 97,3              | MN850588            |
| Skarpretter          | 42042          | 63          | -            | 55,8      | *     | 15A           | Hinnerup            | -       | <i>Unclassified</i>  | 37,9              | MK105855            |

| Escherichia<br>Phage | Genome<br>(bp) | ORFs<br>(n) | tRNAs<br>(n) | GC<br>(%) | Novel | Sample   | Location     | Cluster | Taxonomy         | Similarity<br>(%) | Accession<br>number |
|----------------------|----------------|-------------|--------------|-----------|-------|----------|--------------|---------|------------------|-------------------|---------------------|
| Sortkaff             | 42538          | 61          | -            | 59,5      | *     | 39B      | Hårslev      | -       | Unclassified     | 89,8              | MN850581            |
| Sortsne              | 41912          | 62          | -            | 60        | *     | 40A      | Odense NV    | -       | Unclassified     | 67,6              | MK651787            |
| Aldrigsur            | 42379          | 55          | -            | 55,7      | *     | 44B      | Ålborg V     | XIV     | Autographvirinae | 71,9              | MN850592            |
| Altidsur             | 42197          | 53          | -            | 55,7      | *     | 33D      | Sommersted   | XIV     | Autographvirinae | 71,8              | MN850568            |
| Forsur               | 42476          | 56          | -            | 55,4      | *     | 48D      | Viby         | XIV     | Autographvirinae | 72                | MN850617            |
| Glasur               | 42507          | 56          | -            | 55,4      | *     | 40D      | Odense NV    | XIV     | Autographvirinae | 72,3              | MN850583            |
| Lidtsur              | 42291          | 56          | -            | 54,6      | *     | 30B      | Over Jerstal | XIV     | Autographvirinae | 69                | MK629528            |
| Megetsur             | 42132          | 54          | -            | 55,8      | *     | 31B      | Skovby       | XIV     | Autographvirinae | 73,1              | MN850608            |
| Mellemsur            | 40770          | 50          | -            | 55,8      | *     | 34D      | Vojens       | XIV     | Autographvirinae | 76,4              | MN850570            |
| Smaasur              | 41110          | 50          | -            | 55,4      | *     | 11C      | Varde        | XIV     | Autographvirinae | 93,3              | MN850625            |
| Usur                 | 41906          | 51          | -            | 55,4      | *     | 27A, 27D | Halk         | XIV     | Autographvirinae | 73,3              | MN850624            |

137

138

139 The high-throughput screening method favours easily culturable plaque-forming lytic phages. Still, we identified 104 unique Escherichia phages of  
140 which only 16% were  $\geq 95\%$  similar (BLAST) to already published phages (Table 2). Phages were identified in wastewater samples from 43 of the 48  
141 investigated treatment facilities. From the majority of positive samples (58) a single phage was sequenced, however in some samples the lysate held  
142 more than one phage. Twenty-five of the lysates held two phages, eight lysates held three phages and one had as many as four phages. Of the 104  
143 unique phages, 91 represent novel species (Table 1, 2). Of these, 51 differed by  $\geq 10\%$  from published phage genomes and some have NT similarities as  
144 low as 29% (Table 2).

145 These newly sequenced phages represent a substantial quota of divergent lytic *Escherichia* phages in Danish  
146 wastewater, but are still far from disclosing the true diversity hereof (Figure 2). An extrapolation of species  
147 richness ( $q = 0$ ) predicts a total of 292 distinct species (requiring a sample size of ~900 phages). The relatively  
148 small sample-size in this study ( $n = 136$ ), may subject the estimation to a large prediction bias. The sampling-  
149 method also introduces a bias by selecting for abundance and burst size, thereby potentially underestimating  
150 diversity. Nonetheless, the results provide an indication of the minimal diversity of lytic *Escherichia* (MG1655,  
151 K-12) phages in Danish wastewater, estimated to be as a minimum be in the range of 160 to 420 unique phage  
152 species (Figure 2b). The novelty and diversity of these wastewater phages is truly remarkable and verifies our  
153 hypothesis, as well as the efficiency of the *High-throughput Screening Method* for exploring diverse phages of a  
154 single host (not published).

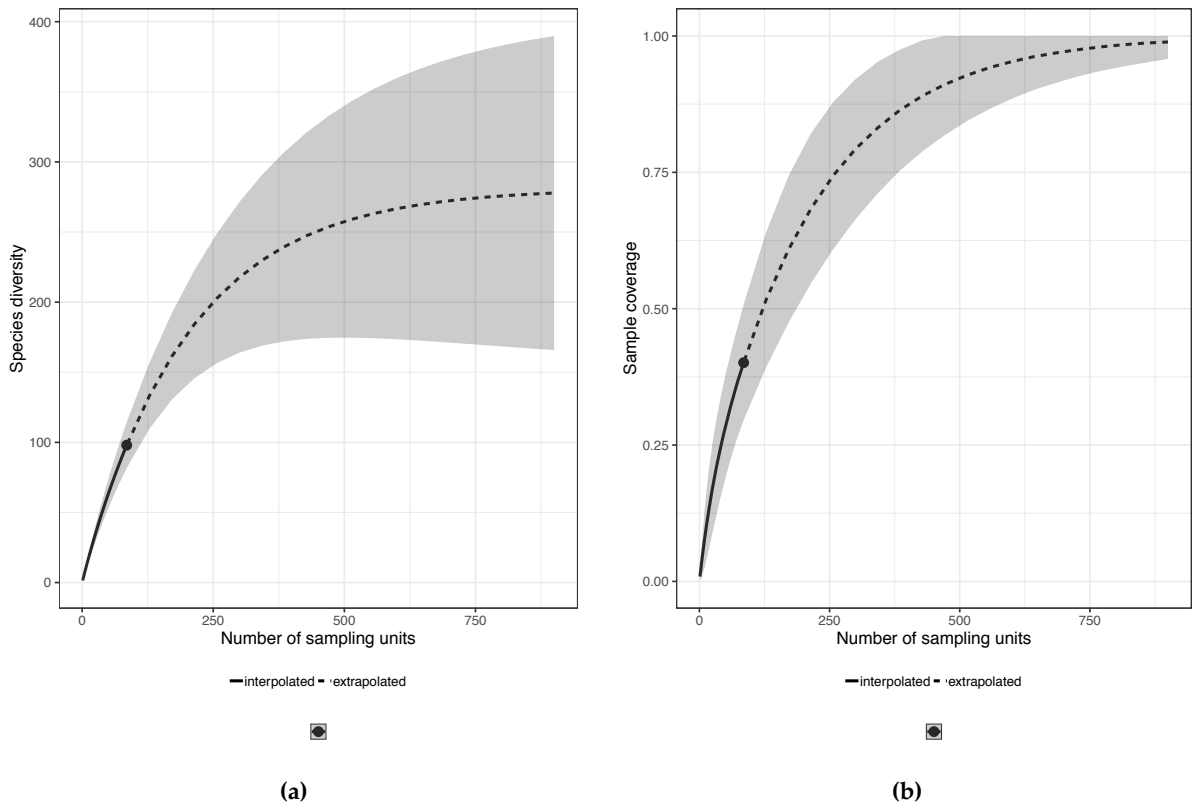

155 **Figure 2 (a)** Sample-size-based rarefaction and extrapolation curve with confidence intervals (0.95). **(b)** Sample  
156 completeness curve with confidence intervals (0.95).

157

**Table 2** Taxonomic distribution of phages identified in 94 Danish wastewater samples, based on similarity to closest related and the ICTV Master Species list. 1.  $\leq 95\%$  similarity to other phages in the dataset. 2.  $\leq 95\%$  similarity to other phages in the dataset and to published phage genomes.

| Taxonomy*                                                       | total | unique <sup>1</sup> | novel <sup>2</sup> |
|-----------------------------------------------------------------|-------|---------------------|--------------------|
| <i>Caudovirales; Myoviridae; Ounavirinae; Felixounavirus</i>    | 33    | 19                  | 19                 |
| <i>Caudovirales; Myoviridae; Ounavirinae; Suspvirus</i>         | 1     | 1                   | 1                  |
| <i>Caudovirales; Myoviridae; Tevenvirinae; Krischvirus</i>      | 2     | 2                   | 1                  |
| <i>Caudovirales; Myoviridae; Tevenvirinae; Dhakavirus</i>       | 3     | 2                   | 2                  |
| <i>Caudovirales; Myoviridae; Tevenvirinae; Mosigvirus</i>       | 4     | 4                   | 2                  |
| <i>Caudovirales; Myoviridae; Tevenvirinae; Tequatrovirus</i>    | 6     | 5                   | 5                  |
| <i>Caudovirales; Myoviridae; Vequintavirinae; Vequintavirus</i> | 15    | 12                  | 9                  |
| <i>Caudovirales; Myoviridae</i>                                 | 15    | 11                  | 10                 |
| <i>Caudovirales; Podoviridae; Autographivirinae</i>             | 10    | 9                   | 9                  |
| <i>Caudovirales; Siphoviridae; Dhillonvirus</i>                 | 6     | 5                   | 5                  |
| <i>Caudovirales; Siphoviridae; Guernseyvirinae; Jerseyvirus</i> | 1     | 1                   | 1                  |
| <i>Caudovirales; Siphoviridae; Seuratvirus</i>                  | 1     | 1                   | 1                  |
| <i>Caudovirales; Siphoviridae; Tunavirinae; Hanriovirus</i>     | 10    | 8                   | 8                  |
| <i>Caudovirales; Siphoviridae; Tunavirinae</i>                  | 15    | 12                  | 8                  |
| <i>Caudovirales; Siphoviridae</i>                               | 1     | 1                   | 1                  |
| <i>Microviridae; Bullavirinae; Alphetvirus</i>                  | 1     | 1                   | 1                  |
| <i>Microviridae; Bullavirinae; Gequatrovirus</i>                | 7     | 5                   | 4                  |
| Unclassified bacterial viruses                                  | 5     | 5                   | 4                  |
| Total                                                           | 136   | 104                 | 91                 |

### 3.2. Phage genome characteristics

The sequenced phage genomes range in sizes from 5 342 bp of the *Microviridae* lilleen to a span in the *Caudovirales* from 38 200 bp of the unclassified sortregn to 170 817 bp of the *Dhakavirus* dhaeg (Figure 3, Table 2). GC contents also vary greatly, from only 35.3% (*Tequatrovirus* teqhad) and up to 60.0% (the unclassified sortsne) (Figure 3, Table 2), heavily diverging from the host GC content of 50.79%. Phages often have a lower GC contents than their host [49], as observed for the majority (81%) of the wastewater phages (Table 2). A lower GC content of phage genomes tends to correlate with an increase in genome size [50], as is also the case for the *Caudovirales* in this study (Table 2). Rocha & Danchin (2002) hypothesized that phages, along with plasmids and insertion sequences, can be considered intracellular pathogens, and like host dependent bacterial pathogens and symbionts, they experience competition for the energetically expensive and less abundant GTP and CTP and as a consequence develop genomes with comparatively higher AT contents [49]. However, the

174 differences in AT richness reported by Rocha & Danchin (2002) for dsDNA and isometric ssDNA phages were  
175 merely 4.2% and 5% [49], while the dsDNA and isometric ssDNA phages in this study deviate from their  
176 isolation host by having up to 31% higher and up to 19% lower AT content (Table 2). Accordingly, the  
177 considerable differences in GC/AT contents may instead primarily be a reflection of past host relations [14].  
178 The sequencing of lysates and not only plaquing phages, may have contributed in enabling the capture of such  
179 a broad GC-content and overall diversity.

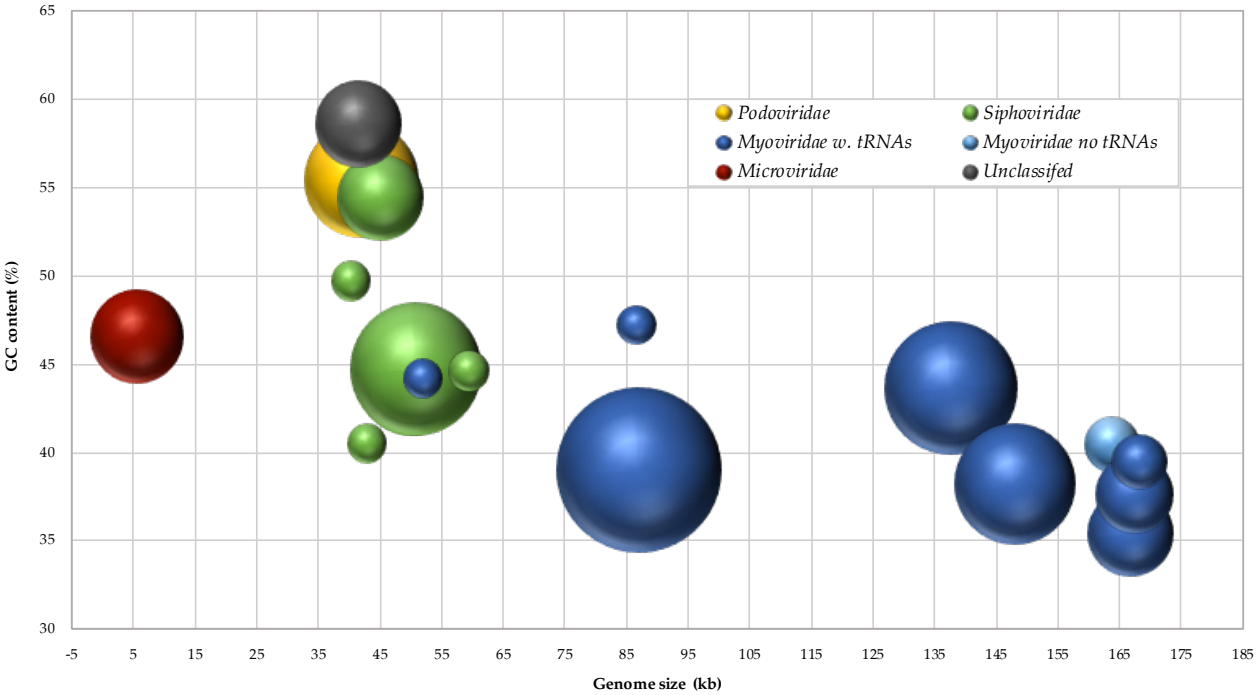

180  
181 **Figure 3** Bubble-diagram of the 104 unique *Escherichia* phages displaying genome size- and GC-content distribution. Area  
182 of bubbles indicates number of phages. The yellow bubble is *Podoviridae* phages, green ones are *Siphoviridae* phage clusters,  
183 dark-blue ones are *Myoviridae* phage clusters with tRNAs, the light-blue bubble is *Myoviridae* phages without tRNAs, the  
184 red bubble is *Microviridae* phages and the grey one is unclassified phages.

186 The genome screening algorithms identified no sequences coding for homologs of known virulence or  
187 antibiotic resistance genes. Though not a definitive exclusion, this interprets as a reduced risk of presence, a  
188 preferable trait for phage therapy application. Currently available tools for AMG screening of viromes did not  
189 provide a comprehensive and exclusive assessment of the AMG pool in the dataset. The majority of genes  
190 identified are not AMGs, but code for phage DNA modification pathways (Table S1). The function of some of

the suggested AMGs is unknown, these include a nicotinamide phosphoribosyltransferase (NAMPT) present in *cluster I* (*Felixovirus* and *Suspovirus*) and *VII* (unclassified *Myoviridae*), a 3-deoxy-7-phosphoheptulonate (DAHP) synthase present in *cluster X* (*Mosigvirus*) and a complete dTDP-rhamnose biosynthesis pathway present in *cluster VI* and *VII* (unclassified *Myoviridae*). The presence of a dTDP-rhamnose biosynthesis pathway in the DNA metabolism region of phage genomes is peculiar, one possible explanation is, that these phages utilize rhamnose for glycosylation of hydroxy-methylated nucleotides in the same manner as the T4 generated glucosyl-hmC [51]. Dihydrofolate reductase, identified in six of the *Myoviridae* clusters, is involved in thymine nucleotide biosynthesis, but is also a structural component in the tail baseplate of T-even phages [52]. Multiple verified DNA modification genes were identified. Methyltransferases, some putative, were detected in all *Myoviridae* of *cluster III* (*vequintavirus*), *VI* (unclassified), *VII* (unclassified), *VIII* (*Krischvirus*), in all *Siphoviridae* of *cluster IV* (*Hanrivervirus*) and in the unclassified phages of *cluster XIII*. Indeed, *cluster XIII* and the singletons *skarpretter*, *sortsne*, and *sortkaff* code for both DNA N-6-adenine-methyltransferases (*dam*) and DNA cytosine methyltransferases (*dcm*). Finally, two novel epigenetic DNA hypermodification pathways were identified. The *mosigviruses* of *cluster X* code for arabinosylation of hmC [51], while the novel *seuratvirus* *Skure* codes for the recently verified complex 7-deazaguanine DNA hypermodification system [53,54].

### 3.3. Forty-eight novel *Myoviridae* phages species

The *Myoviridae* genomes (56 unique, 49 novel) represents the greatest span in genome sizes in this study, from the unclassified flopper of 52092 bp to the *dhakavirus* *dhaeg* of 170817 bp), all, except the *krischviruses*, code for tRNAs (Figure 3, Table 2). The *Myoviridae* group into nine distinct clusters and four singletons, representing at least three subfamilies; *Tevenvirinae*, *Vequintavirinae* and *Ounavirinae* in addition to 11 unclassified *Myoviridae* (*cluster VI & VII*) (Figure 1, Table 2). The eleven novel *Tevenvirinae* distributes into four distinct genera, two of the *Krischvirus* (*cluster VIII*, 164kb, 40.5% GC, no tRNAs), two of the *Dhakavirus* (*cluster IX*, 166-170 kb, 39.4-39.5% GC, 3 tRNAs), two of the *Mosigvirus* (*cluster X*, 169 kb, 37.6-37.7% GC, 2 tRNAs) and five of the *Tequatrovirus* (*cluster XI*, 165-168 kb, 35.3-35.5% GC, 6-11 tRNAs), while the nine novel

215 *Vequintavirinae* are all vequintaviruses (*cluster III*, 136-142 kb, 43.6-43.7% GC, 5 tRNAs) closely related (91.1-  
216 93.8%, BLAST) to classified species. The vequintaviruses were identified in samples from 12 treatment  
217 facilities. Only reads from two samples of a dataset of human gut viromes based on timeseries of faecal  
218 samples from 10 healthy persons [55] mapped to the wastewater phages, and only to vequintaviruses. These  
219 reads covered 43-54% and 13-26% of all the *Vequintavirus* genomes except pangalan and navn, respectively.  
220 This suggests that the vequintaviruses are related to entero-phages. All but one of the *Ounavirinae* (*cluster I*,  
221 82-89 kb, 38.9-39.2% GC, 17-22 tRNAs) are felixounaviruses (89.7-93.9%, BLAST) with an intra-Gegenees score  
222 of 71-86% (Figure 1). The *Felixounavirus* is a relatively large genus with 17 recognized species. In this study,  
223 felixounaviruses were identified in samples from 23 of the 48 facilities, indicating that they are both ubiquitous  
224 in Danish wastewater, numerous and easily cultivated. The last ounavirus, mistaenkt (86.7 kb, 47.2% GC, 22  
225 tRNAs) is a *Suspovirus*. The five *cluster VI* phages (144.9-151.5 kb, 39±0.1% GC, 10-11 tRNAs) belong to a  
226 phylogenetic distinct clade, the recently proposed '*Phapecoctavirus*', and have substantial similarity (86-90%,  
227 BLAST) with the anticipated type species *Escherichia* phage phAPEC8 (JX561091) [22,56]. *Cluster VII* have  
228 significantly ( $p = 0.038$ ) larger genomes (145.8-147.5 kb) with marginally, though not significantly ( $p = 0.786$ ),  
229 lower GC contents of 37.4-37.5%, all have 13 tRNAs (Table 2) and code for NAMPT not present in *cluster VI*  
230 (Table S1). As a group, *cluster VII* are even more homogeneous than *cluster VI* and all are closely related (92-  
231 95%, BLAST) to the same five unclassified *Enterobacteriaceae* phages vB\_Ecom\_PHB05 (MF805809),  
232 vB\_vPM\_PD06 (MH816848), ECGD1 (KU522583), phi92 (NC\_023693) and vB\_vPM\_PD114 (MH675927)  
233 [57,58], with whom they represent a novel unclassified genera. The distinctive and novel singleton flopper  
234 only shares NT similarity (36-87%, BLAST) with six other phages, the *Escherichia* phages ST32 (MF04458) [59]  
235 and phiEcoM\_GJ1 (EF460875) [60], the *Erwinia* phages Faunus (MH191398) [61] and vB\_EamM-Y2  
236 (NC\_019504) [62], and the *Pectobacterium* phages PM1 (NC\_023865) [63] and PP101 (KY087898). This group of  
237 unclassified phages all have genomes of 52.1-56.6 kb with 43.6-44.9% GC and while only flopper, phiEcoM\_GJ1  
238 and PM1 code for a single tRNA, all of them have exclusively unidirectional coding sequences (CDSs) and  
239 code for RNA polymerases, characteristics of the *Autographivirinae* of the *Podoviridae* [64]. However, the

verified morphology of ST32, phiEcoM\_GJ1, PM1 and PP101, icosahedral head, neck and a contractile tail with tail fibres, classifies them as myoviruses [59,60,62,63]. Based on NT similarity and genome synteny, these seven phages belong to the same, not yet classified, peculiar lineage first described by Jamalludeen *et al.*, (2008) [60].

### 3.4. Five novel Microviridae phages species

The singleton lilleven (6.1 kb, 44.4% GC, no tRNA) and the five (four novel) *cluster II* phages (5.3-5.5 kb, 46.9-47.2% GC, no tRNAs) are all *Microviridae*, a family of small ssDNA non-enveloped icosahedral phages (Table 2). Lilleven is closely related to (93.9%, BLAST), have pronounced gene pattern synteny and high AA similarities (89-90%), with the Alphatremicrovirus Enterobacteria phage St1 (Figure S2), and is a novel species of the genus *Alphatremicrovirus*, subfamily *Bullavirinae*. The *cluster II* phages comprise four distinct species, only differing by single nucleotide polymorphisms and in non-coding regions (Figure S2). They have high intra-Gegenees score (88-92%) and share genomic organisation and extensive NT similarity (92.6-94.5%, BLAST) with the unclassified microvirus Escherichia phage SECphi17 (LT960607), primarily differing by single nucleotide polymorphisms and in noncoding regions (Figure S2, Table 2). *Cluster II* are only related to one recognised phage species *Escherichia virus ID52* (63%, BLAST), genus *Gequatrovirus*, subfamily *Bullavirinae*, with whom they predominantly differ in the region in and around the major spike protein (*gpG*), a distinctive marker of the subfamily *Bullavirinae* involved in host attachment. The phylogenetic analysis separates *cluster II* from the gequatroviruses, and both the Gegenees scores (<22%) and NT similarities (<65% BLAST) are moderately low (Figure S2). Nonetheless, *cluster II* are still, based on pronounced genome organisation synteny and a conserved AA similarity (62-64%, Gegenees) considered to be gequatroviruses (Figure S2).

The sequencing of the microviruses is peculiar, as library preparation with the Nextera® XT DNA kit applies transposons targeting dsDNA. However, during microvirus infection the host polymerase converts the viral ssDNA into an intermediate state of covalently closed dsDNA, which is then replicated in rolling circle by viral replication proteins transcribed by the host RNA polymerase [65]. This intermediate state may have enabled the library preparation. The presence of host DNA in the sequence results indicates an

insufficient initial DNase1 treatment, which can be attributed to chemical inhibition or inactivation of the enzyme by adhesion to the sides of wells. Hence, it is reasonable to assume that the extracted microvirus DNA was captured as free dsDNA inside host cells during ongoing infections.

### 3.5. Twenty-five novel Siphoviridae phage species

In spite of similar genome sizes, the large group of *Siphoviridae*, is the most diverse (28 unique, 24 novel) in this study, with GC contents ranging from 43.9-54.6% (Figure 3, Table 2). The majority, *clusters IV-V* and singleton jahat, are of the subfamily *Tunavirinae*, while the remaining are allocated into at least three divergent genera, *Dhillonvirus*, *Jerseyvirus* and *seuratovirus*.

*Cluster IV* (46.7-51.6 kb, 43.9-44.1% GC, no tRNAs), *V* (49.8-51.6 kb, 44.6-44.8% GC, no tRNAs) and jahat (51.1 kb, 45.7% GC, no tRNAs) have low inter-Gegenees scores (7-20%) (Figure 1), yet they form a monophyletic clade and are all closely related (85-94%, BLAST) to published *Tunavirinae*. The *Cluster IV* phages are notable, as they represent a significant increase to the small genus *Hanrivervirus* comprising only the type species *Shigella virus pSf-1* (51.8 kb, 44% GC, no tRNAs) isolated from the Han River in Korea [66]. The common ancestry of *Cluster IV* and pSf-1 is evident by comparable genome sizes, GC contents, genomic organization and substantial NT (86-90%, BLAST) and AA (77-85%, Gegenees) similarities (Table 2, Figure S3). During their differentiation, many deletions and insertions of small hypothetical genes have occurred, most notable is a unique version of a putative tail-spike protein in seven of the *cluster IV* hanriverviruses, indicating divergent host ranges (Figure S3). All the hanriverviruses code for (putative) *dam* and Psf-1 is resistant towards at least six restriction endonucleases [66], suggesting they employ DNA methylation as a defence strategy.

The five novel dhillonviruses of *Cluster XII* (44.4-46.0 kb, 54.2-54.6% GC, no tRNAs) have substantial NT similarities with a group of unclassified dhillonviruses (80-89%, BLAST) (Table 2) and the type species *Escherichia virus HK578* (77-80%, BLAST). As with the hanriverviruses, and as observed by Korf *et al.*, (2019) [22], their genomes mainly differ in minor hypothetical genes and in putative tail-tip proteins, indicating divergent host ranges (Figure S4). Based on NT similarity and the presence of the canonical 7-deazaguanine

operon the singleton skure (59.4 kb, 44.6% GC, no tRNAs) is a seuratvirus, while the singleton Buks (40.3 kb, 49.7% GC, no tRNAs) is assigned to the genus *Jerseyvirus*, subfamily *Guernseyvirinae*.

### 3.5.1 Escherichia phage halfdan, a novel lineage within the *Siphoviridae*

Interestingly, the singleton halfdan (42.8 kb, 53.7% GC, no tRNAs) has only miniscule similarity with published phages (12-29%, BLAST). These entail two *Pseudomonas* phages vB\_PaeS\_SCUT-S3 (MK165657) and Ab26 (HG962376) [67] both *Septimatreviruses*, two *Acinetobacter* phages of the *Lokivirus* IMEAB3 (KF811200) and type species *Acinetobacter virus Loki* [68], and to a lesser degree the unclassified *Achromobacter* phage phiAxp-1 (KP313532) [69]. They have a common genomic organization, yet their intra-Gegenees score is  $\leq 1\%$  and NT similarity is negligent in roughly a third of halfdan's 57 CDSs (Figure 4b, d). The phylogeny and AA similarities (Gegenees) also indicate a distant relation, although grouping halfdan closer with the lokiviruses (40-43%) than the septimatreviruses (33-34%) (Figure 4a, c). The genome of halfdan is mosaic, resembling the lokiviruses in the structural region and the septimatreviruses in the replication region (Figure 4d). Remarkably, halfdan has no NT similarity with known *Escherichia* phages, which could be an indication of *E. coli* not being the natural host, and that halfdan may have transcended species barriers. However, host range, morphology and other physical characteristics are beyond the scope of this study, and will be determined in future lab-based studies. Notably, both halfdan, Loki and Ab26 code for a (putative) MazG, although there is negligible sequence similarity (Figure 4d). Phage encoded MazG is hypothesized to be involved in restoring protein synthesis in a starved cell, in order to keep the cell alive, and ensure optimal replication conditions [70]. The phylogeny, whole genome alignments and low NT and AA similarities suggests that halfdan is distinct from other known phages (Figure 4). Accordingly, as per the ICTV guidelines, halfdan is the first phage sequenced of a novel *Siphoviridae* genus. Yet, halfdan is also, by its mosaicism, an indicator of the genetic continuum of phages questioning the validity of taxonomic interpretations.

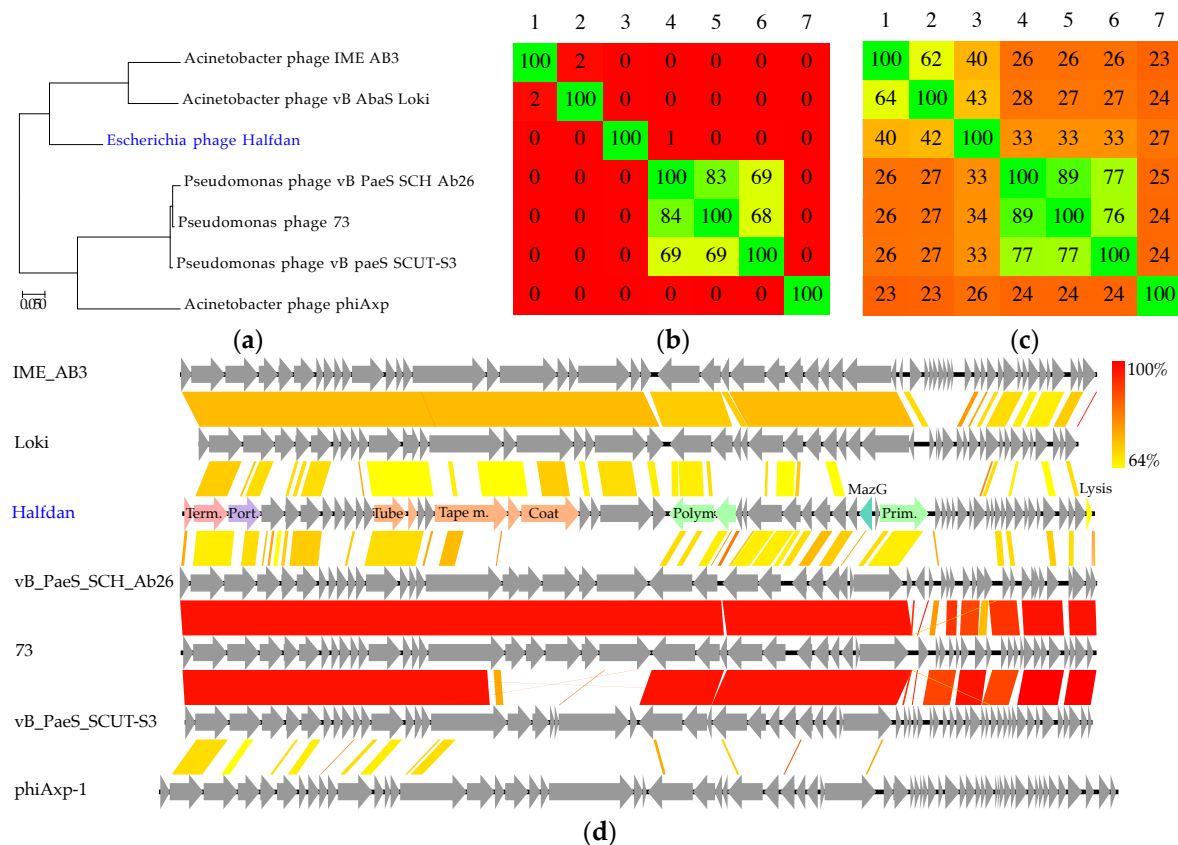

311 **Figure 4** (a) Phylogenetic tree (Maximum log Likelihood: -7678.71, large terminase subunit), scalebar: substitutions per  
 312 site. (b) Phylogenomic nucleotide distances (Gegenees, BLASTn; fragment size: 200, step size: 100, threshold: 0%). (c)  
 313 Phylogenomic amino acid distances (Gegenees, tBLASTx; fragment size: 200, and step size: 100, threshold: 0%). (d)  
 314 Pairwise alignment of phage genomes (Easyfig, BLASTn), the colour bars between genomes indicate percent pairwise  
 315 similarity as illustrated by the colour bar in the upper right corner (Easyfig, BLASTn). Gene annotations are provided for  
 316 phages identified in this study and deposited in GenBank.

### 317 3.6. Nine novel Podoviridae phage species

318 The nine novel *Podoviridae* (cluster XIV, 40.7-42.5 kb, 55.4-55.7% GC, no tRNAs), all with the hallmarks of  
 319 the *Autographvirinae* i.e. unidirectionally encoded genes and RNA polymerases [64], have conserved genome  
 320 organisation with the type species of the *Phikmvvirus*, *Pseudomonas virus phiKMV* (42.5 kb, 62.3% GC, no  
 321 tRNAs) [71], but almost no NT similarity (<1%, BLAST). Besides the unclassified *Autographvirinae*  
 322 *Enterobacteria phage J8-65* (NC\_025445) (40.9 kb, 55.7% GC, no tRNAs), with which *Cluster XIV* has  
 323 considerable NT similarity (69-93%, BLAST) and similar GC content, *Cluster XIV* only share >5% nucleotide  
 324 similarity (40-42%, BLAST) with the *Phikmvvirus Pantoea virus Limezero* (43.0 kb, 55.4% GC, no tRNAs) [72]

(Figure 5, Table 2). The *Phikmvvirus* consists of four species, *phiKMV*, *Limezero*, *Pantoea virus Limelight* (44.5 kb, 54% GC, no tRNAs) [72] and *Pseudomonas virus LKA1* (41.6 kb, 60.9% GC, no tRNAs) [73].

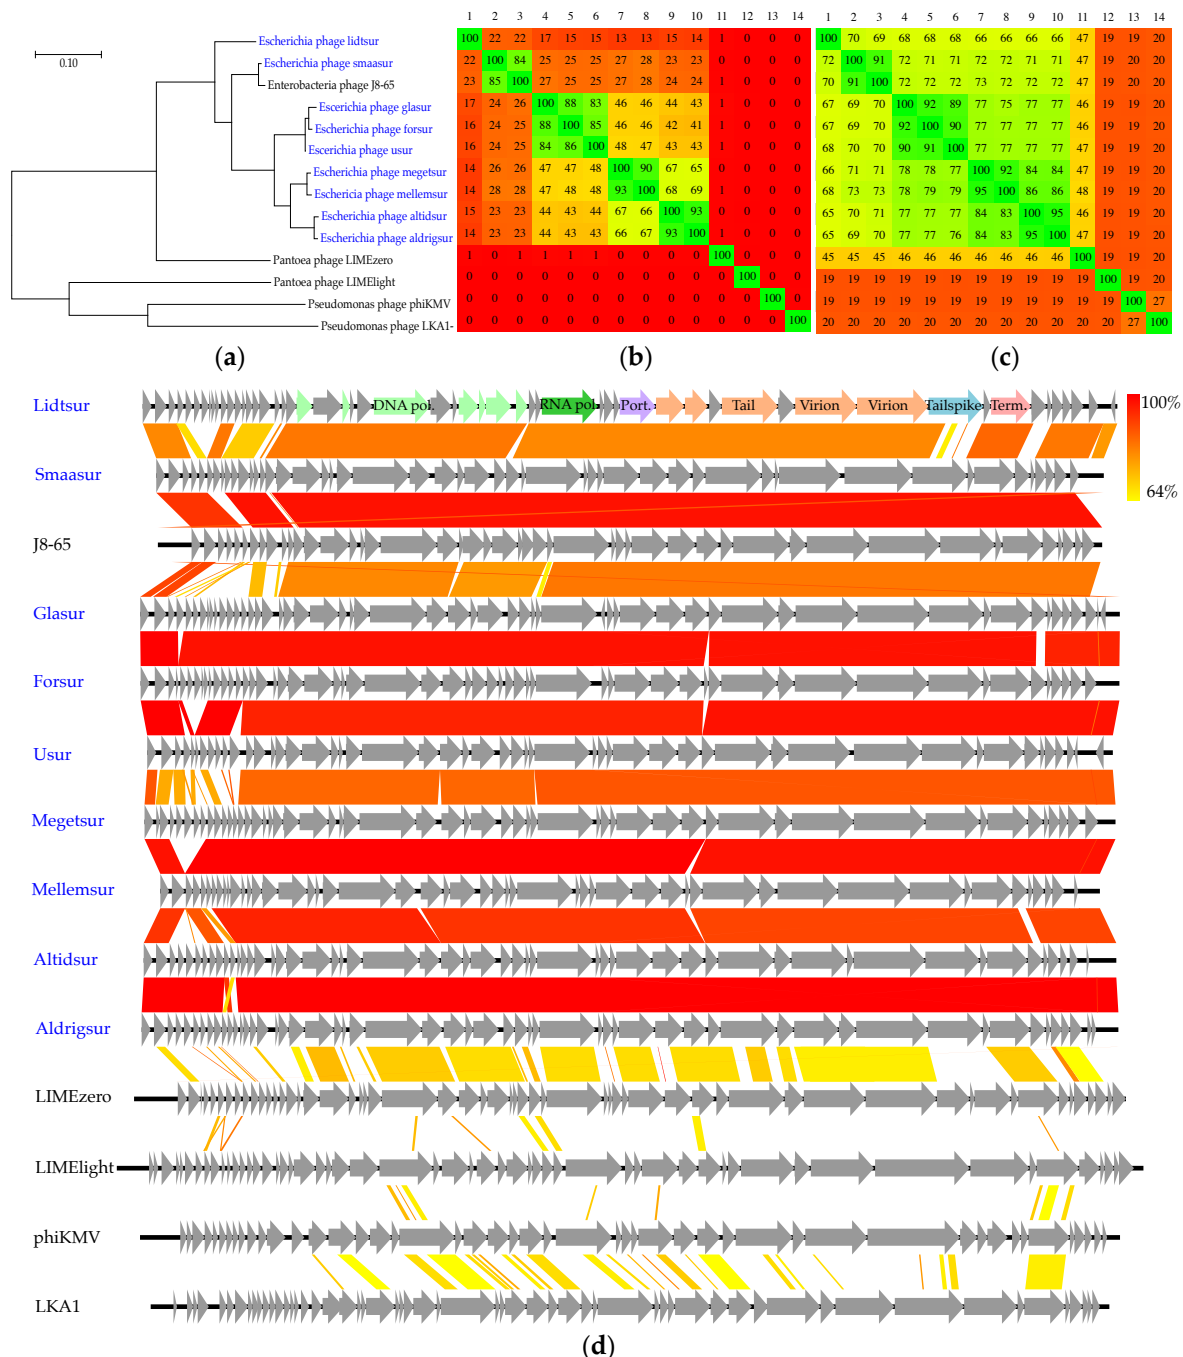

**Figure 5** (a) Phylogenetic tree (Maximum log Likelihood: -11728.26, large terminase subunit), scalebar: substitutions per site. (b) Phylogenomic nucleotide distances (Gegenees, BLASTn: fragment size: 200, step size: 100, threshold: 0%). (c) Phylogenomic amino acid distances (Gegenees, tBLASTx: fragment size: 200, and step size: 100, threshold: 0%). (d) Pairwise alignment of phage genomes (Easyfig, BLASTn), the colour bars between genomes indicate percent pairwise similarity as illustrated by the colour bar in the upper right corner (Easyfig, BLASTn). Gene annotations are provided for phages identified in this study and deposited in GenBank.

*Cluster XIV* and J8-65 form a diverse monophyletic clade, with a substantial amount of deletions and insertions between them, subdividing into three sub-clusters with intra-Gegenees scores  $\leq 28\%$  (Figure 5a, d). Phage lidtsur is singled-out and also codes for a unique version of tailspike colanidase, smaasur resembles J8-65 phage and the rest group together (Figure 5). Still, the three sub-clusters have for a large part conserved AA sequences (66-72%, Gegenees) (Figure 5b, c, d). Interestingly, this also applies to *Limezero*, with whom they have a Gegenees NT score  $\leq 1\%$ , but an AA similarity of 45-48%, supporting the phylogenetic grouping of *Limezero* and *cluster XIV* (Figure 5a, b, c). Based on phylogeny, limited NT and low AA similarities it is evident that there is a very distant relation between *cluster XIV* (and J8-65) and the phikmvviruses (Figure 5). Hence, *cluster XIV* (and J8-65) are not immediately, according to the ICTV guidelines, considered phikmvviruses. However, the *Phikmvvirus* already includes phages with minuscule DNA homology infecting divergent hosts [72,73]. The genus delimitation is based on overall genome architecture with the location of a single-subunit RNA polymerase gene adjacent to the structural genes, and not in the early region as in T7-like phages [16]. Another characteristic feature of the *phikmvvirus* is the presence of direct terminal repeats, though not yet verified in all members [72]. Read abundance in non-coding regions in genomic ends of *cluster XIV* genomes suggests they also have direct terminal repeats of a few hundred bp. In conclusion, we consider the *cluster XIV* phages (and J8-65) to be of the same lineage as the phikmvviruses, but contemplate that this genus may at some point be divided into at least two independent genera, as we learn more of the nature of the genes which distinguish *cluster XIV* from the other phikmvviruses on both NT and AA level and account for more 50% of their genomes.

### 3.7. Unclassified bacterial viruses represent two novel lineages

The four novel phages sortsyn of *cluster XIII* and the three singletons sortsne, sortkaff (41.9-42.5 kb, 59-60% GC, no tRNAs) and skarpretter (42.0 kb, 55.8% GC, no tRNAs) all have small genomes and high GC contents (Figure 3) and are suggested to represent two distinct novel lineages. They only share considerable ( $\geq 6\%$ , BLAST) NT similarity with four phages, Enterobacteria phage IME\_EC2 (KF591601)(41.5 kb, 59.2% GC,

no tRNAs) isolated from hospital sewage [74], Salmonella phage lumpael (MK125141)(41.4 kb, 59.5% GC, no tRNAs) isolated from wastewater of the same sample-set in a previous study, Klebsiella phage vB\_KpnS\_IME279 (MF614100) (42.5 kb, 59.3% GC, no tRNAs) and Escherichia phage C130\_2 (MH363708)(41.7 kb, 55.4% GC, no tRNAs) isolated from cheese [75].

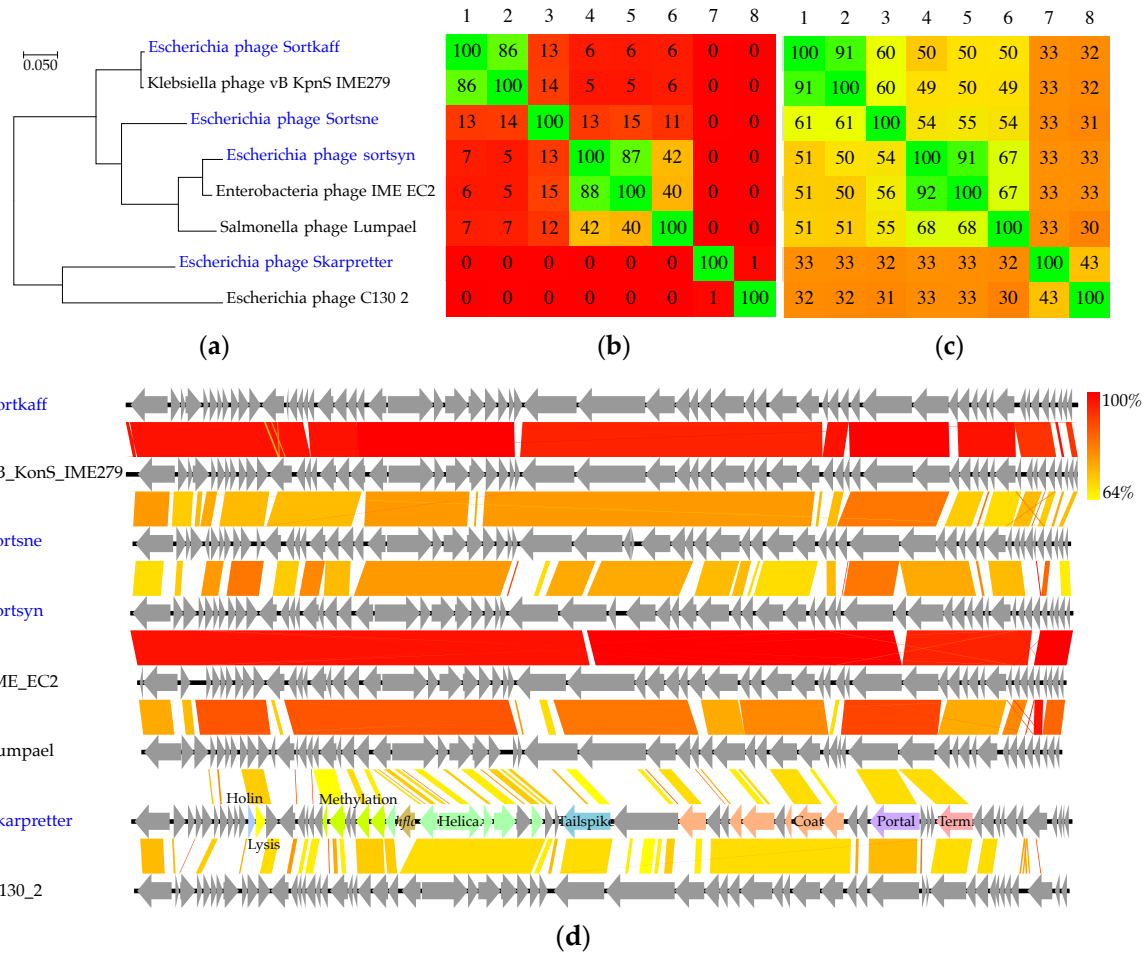

**Figure 6** (a) Phylogenetic tree (Maximum log Likelihood: -8023.43, large terminase subunit), scalebar: substitutions per site. (b) Phylogenomic nucleotide distances (Gegenees, BLASTn: fragment size: 200, step size: 100, threshold: 0%). (c) Phylogenomic amino acid distances (Gegenees, tBLASTx: fragment size: 200, and step size: 100, threshold: 0%). (d) Pairwise alignment of phage genomes (Easyfig, BLASTn), the colour bars between genomes indicate percent pairwise similarity as illustrated by the colour bar in the upper right corner (Easyfig, BLASTn). Gene annotations are provided for phages identified in this study and deposited in GenBank.

Curiously, IME\_EC2 is a confirmed (TEM) *Podoviridae*, with a short non-contractile tail [74], while C130\_2 is a confirmed (TEM) *Myoviridae* with a long contractile tail [75]. Lumpael and vB\_KpnS\_IME279 are uncharacterised, yet both are assigned as *Podoviridae* in GenBank [17]. Although sortsne, sortkaff, sortsyn,

vB\_KpnS\_IME279, IME\_EC2 and lumpael form a monophyletic clade, the Gegenees score (5-15%) between sub-clusters is surprisingly low (Figure 6a, b). Still, these six phages have comparable genome sizes (41.5-42.5 kb) and organisation, including similar relatively small-sized structural proteins, *dam* and *dcm* genes, equally high GC contents (59.5±0.5%) and relatively high AA similarities (49-91%) (Figure 6a, c, Table 2). Hence, they are clearly of the same lineage and likely to resemble IME\_EC2 in having *Podoviridae* morphology. This group is also clearly distinct from all other known phages (<5%, BLAST) and as such constitute a novel genus, with a delimitation to be determined by future physical characterisation. Skarpretter and C130\_2 form a monophyletic clade and both have slightly, though not significantly ( $P = 0.38$ ), lower GC contents (55.6±0.2%), indicating a common ancestry and host. The conserved genome organisation and clustering of skarpretter with the other *Podoviridae* (Figure 1, 6d), suggests skarpretter also has *Podoviridae* morphology. Still, its closest relative C130\_2 is described as a *Myoviridae* [75], leaving the true morphology of skarpretter a conundrum only resolved by TEM imaging. According to ICTV guidelines both skarpretter and C130\_2 are representatives of novel lineages, as they are both clearly distinct from all other known phages. Skarpretter and C130\_2 have very low NT (1% Gegenees, 38% BLAST) and AA similarities (43%) (Figure 6b, c). Indeed, skarpretter has ≤20% NT similarity (BLAST) with all other published phages. In addition, skarpretter codes for a putative *hflc* gene possibly inhibiting proteolysis of essential phage proteins, located in the replication region (Figure 6d). This gene, has to our knowledge never before been observed in phages, but occurs in almost all proteobacteria, including *E. coli* MG1655 [76].

#### 4. Conclusion

By screening Danish wastewater, we identified no less than 104 unique *Escherichia* MG1655 phages, but predict the species richness to be at least in the range of 160-420, and even higher if including phages infecting other *Escherichia* species, though it is expected to fluctuate drastically over time and both within and between treatment facilities. Among the unique phages 91 represent novel phage species of at least four different families *Myoviridae*, *Siphoviridae*, *Podoviridae* and *Microviridae*. The diversity of these phages is striking, they

vary greatly in genome size and have a very broad GC-content range - possibly prompted by former or current alternate hosts. These findings add to our growing understanding of phage ecology and diversity, and through classification of these many phages we come yet another step closer to a more refined taxonomic understanding of phages. Furthermore, the numerous and diverse phages isolated in this study, all lytic to the same single strain, serve as an excellent opportunity to learn important phage-host interactions in future studies. These include, but are not limited to lysogen induced phage immunity, host-range and anti-RE systems. Finally, apart from substantial contributions to known genera, we came upon several unclassified lineages, some completely novel, which in our opinion constitute novel phage genera. We consider sortreg, sortkaff, sortsyn and sortsne together with lumpael, vB\_kpnS\_IME278 and IME\_EC2 to constitute a novel genus within the *Podoviridae*. The *Myoviridae* flopper joins an interesting group of not yet classified phages with *Myoviridae* morphology and *Autographvirinae* characteristics, just as *cluster VII* together with five unclassified phages represent a novel unclassified genus within the *Myoviridae*. Lastly, we consider the *Siphoviridae* halfdan and the unclassified bacterial virus skarpretter to be the first sequenced representatives of each their novel genus. In conclusion, this study shows that uncharted territory still remains for even well-studied phage-host couples.

**Supplementary Materials:** Figure S1: Microviridae, Figure S2: Hanriversviruses, Figure S3: Dhillonviruses, Table 1 Auxiliary metabolism genes.

**Funding:** This research was funded by Villum Experiment Grant 17595, Aarhus University Research Foundation AUFF Grant E-2015-FLS-7-28 to Witold Kot and Human Frontier Science Program RGP0024/2018

**Acknowledgments:** This study had not been possible without the much-appreciated contribution by the many members of the Danish Water and Wastewater Association (DANVA), who kindly supplied us with time-series of wastewater samples from their treatment facilities. A special thanks to the Billund and Grindsted treatment facilities of Billund Vand & Energi, Lynetten, Avedøre and Damhusåen treatment facilities of BIOFOS, Kolding treatment facility of BlueKolding, Esbjerg Øst, Esbjerg Vest, Ribe, Varde og Skovlund treatment facilities of DIN Forsyning, Drøbro, Hadsten, Hammel, Hinnerup and Voldum treatment facilities of Favrskov Forsyning, Haerning treatment facility of Herning Vand, Hillerød

420 treatment facility of Hillerød Forsyning, Lemvig treatment facility of Lemvig Vand og Spildevand, Bevtøft, Gram,  
 421 Haderslev, Halk, Jegerup, Nustrup, Over Jerstal, Skovby, Skrydstrup, Sommersted, Vojens and Årøsund treatment  
 422 facilities of Provas, Marselisborg, Egå and Viby treatment facilities of Aarhus vand, Hedensted, Juelsminde and Tørring  
 423 treatment facilities of Hedensted Spildevand, Ejby Mølle, Bogense, Hofmanskave, Hårslev, Nordvest, Nordøst, Otterup  
 424 and Søndersø treatment facilities of VandCenterSyd, Øst and Vest treatment facilities of Aalborg Forsyning and finally  
 425 Helsingør treatment facility of Forsyning Helsingør.

426 **Competing interests:** The authors declare no competing interests.

## 427 References

- 428 1. Weinbauer, M.G.; Rassoulzadegan, F. Are viruses driving microbial diversification and diversity? *Environ.*  
 429 *Microbiol.* **2003**, *6*, 1–11.
- 430 2. Weitz, J.S.; Wilhelm, S.W. Ocean viruses and their effects on microbial communities and biogeochemical cycles.  
 431 *F1000 Biol. Rep.* **2012**, *4*, 17.
- 432 3. Crummett, L.T.; Puxty, R.J.; Weihe, C.; Marston, M.F.; Martiny, J.B.H. The genomic content and context of  
 433 auxiliary metabolic genes in marine cyanomyoviruses. *Virology* **2016**, *499*, 219–229.
- 434 4. Boyd, E.F. Bacteriophage-Encoded Bacterial Virulence Factors and Phage–Pathogenicity Island Interactions. *Adv.*  
 435 *Virus Res.* **2012**, *82*, 91–118.
- 436 5. Fortier, L.-C.; Sekulovic, O. Importance of prophages to evolution and virulence of bacterial pathogens.  
 437 <https://doi.org/10.4161/viru.24498> **2013**.
- 438 6. Volkova, V. V; Lu, Z.; Besser, T.; Gröhn, Y.T. Modeling the infection dynamics of bacteriophages in enteric  
 439 *Escherichia coli*: estimating the contribution of transduction to antimicrobial gene spread. *Appl. Environ.*  
 440 *Microbiol.* **2014**, *80*, 4350–62.
- 441 7. Bearson, B.L.; Allen, H.K.; Brunelle, B.W.; Lee, I.S.; Casjens, S.R.; Stanton, T.B. The agricultural antibiotic

- 442 carbadox induces phage-mediated gene transfer in Salmonella. *Front. Microbiol.* **2014**, 5, 52.
- 443 8. Grose, J.H.; Casjens, S.R. Understanding the enormous diversity of bacteriophages: the tailed phages that infect  
444 the bacterial family Enterobacteriaceae. *Virology* **2014**, 468–470, 421–443.
- 445 9. Dykhuizen, D. Species Numbers in Bacteria. *Proc. Calif. Acad. Sci.* **2005**, 56, 62.
- 446 10. Hatfull, G.F.; Pedulla, M.L.; Jacobs-Sera, D.; Cichon, P.M.; Foley, A.; Ford, M.E.; Gonda, R.M.; Houtz, J.M.;  
447 Hryckowian, A.J.; Kelchner, V.A.; et al. Exploring the Mycobacteriophage Metaproteome: Phage Genomics as an  
448 Educational Platform. *PLoS Genet.* **2006**, 2, e92.
- 449 11. Hatfull, G.F. Mycobacteriophages: Windows into Tuberculosis. *PLoS Pathog.* **2014**, 10, e1003953.
- 450 12. Hatfull, G.F.; Jacobs-Sera, D.; Lawrence, J.G.; Pope, W.H.; Russell, D.A.; Ko, C.C.; Weber, R.J.; Patel, M.C.;  
451 Germane, K.L.; Edgar, R.H.; et al. Comparative Genomic Analysis of 60 Mycobacteriophage Genomes: Genome  
452 Clustering, Gene Acquisition, and Gene Size. *J. Mol. Biol.* **2010**, 397, 119–143.
- 453 13. Dedrick, R.M.; Jacobs-Sera, D.; Bustamante, C.A.G.; Garlena, R.A.; Mavrich, T.N.; Pope, W.H.; Reyes, J.C.C.;  
454 Russell, D.A.; Adair, T.; Alvey, R.; et al. Prophage-mediated defence against viral attack and viral counter-  
455 defence. *Nat. Microbiol.* **2017**, 2, 16251.
- 456 14. Jacobs-Sera, D.; Marinelli, L.J.; Bowman, C.; Broussard, G.W.; Guerrero Bustamante, C.; Boyle, M.M.; Petrova,  
457 Z.O.; Dedrick, R.M.; Pope, W.H.; Science Education Alliance Phage Hunters Advancing Genomics And  
458 Evolutionary Science Sea-Phages Program, S.E.A.P.H.A.G. and E.S. (SEA-P.; et al. On the nature of  
459 mycobacteriophage diversity and host preference. *Virology* **2012**, 434, 187–201.
- 460 15. Hatfull, G.F. The Secret Lives of Mycobacteriophages. *Adv. Virus Res.* **2012**, 82, 179–288.
- 461 16. Lefkowitz, E.J.; Dempsey, D.M.; Hendrickson, R.C.; Orton, R.J.; Siddell, S.G.; Smith, D.B. Virus taxonomy: the

- 462 database of the International Committee on Taxonomy of Viruses (ICTV). *Nucleic Acids Res.* **2018**, 46, D708–D717.
- 463 17. Benson, D.A.; Cavanaugh, M.; Clark, K.; Karsch-Mizrachi, I.; Lipman, D.J.; Ostell, J.; Sayers, E.W. GenBank.  
464 *Nucleic Acids Res.* **2017**, 45, D37–D42.
- 465 18. Lawrence, J.G.; Hatfull, G.F.; Hendrix, R.W. Imbrolios of viral taxonomy: genetic exchange and failings of  
466 phenetic approaches. *J. Bacteriol.* **2002**, 184, 4891–905.
- 467 19. Aiewsakun, P.; Adriaenssens, E.M.; Lavigne, R.; Kropinski, A.M.; Simmonds, P. Evaluation of the genomic  
468 diversity of viruses infecting bacteria, archaea and eukaryotes using a common bioinformatic platform: steps  
469 towards a unified taxonomy. *J. Gen. Virol.* **2018**, 99, 1331–1343.
- 470 20. Nelson, D. Phage taxonomy: we agree to disagree. *J. Bacteriol.* **2004**, 186, 7029–31.
- 471 21. Adriaenssens, E.; Brister, J.R. How to Name and Classify Your Phage: An Informal Guide. *Viruses* **2017**, 9.
- 472 22. Korf; Meier-Kolthoff; Adriaenssens; Kropinski; Nimtz; Rohde; van Raaij; Wittmann Still Something to Discover:  
473 Novel Insights into Escherichia coli Phage Diversity and Taxonomy. *Viruses* **2019**, 11, 454.
- 474 23. Jurczak-Kurek, A.; Gąsior, T.; Nejman-Faleńczyk, B.; Bloch, S.; Dydecka, A.; Topka, G.; Necel, A.; Jakubowska-  
475 Deredas, M.; Narajczyk, M.; Richert, M.; et al. Biodiversity of bacteriophages: morphological and biological  
476 properties of a large group of phages isolated from urban sewage. *Sci. Rep.* **2016**, 6, 34338.
- 477 24. Sambrook, J.F.; Russell, D.W.; Editors *Molecular cloning: A laboratory manual, third edition.*; 2nd ed.; Cold Spring  
478 Harbor Laboratory, 2000; ISBN 0 87969 309 6.
- 479 25. Kot, W.; Vogensen, F.K.; Sørensen, S.J.; Hansen, L.H. DPS – A rapid method for genome sequencing of DNA-  
480 containing bacteriophages directly from a single plaque. *J. Virol. Methods* **2014**, 196, 152–156.
- 481 26. Bankevich, A.; Nurk, S.; Antipov, D.; Gurevich, A.A.; Dvorkin, M.; Kulikov, A.S.; Lesin, V.M.; Nikolenko, S.I.;

- 482           Pham, S.; Pribelski, A.D.; et al. SPAdes: a new genome assembly algorithm and its applications to single-cell  
483           sequencing. *J. Comput. Biol.* **2012**, *19*, 455–77.
- 484   27.     Brettin, T.; Davis, J.J.; Disz, T.; Edwards, R.A.; Gerdes, S.; Olsen, G.J.; Olson, R.; Overbeek, R.; Parrello, B.; Pusch,  
485           G.D.; et al. RASTtk: A modular and extensible implementation of the RAST algorithm for building custom  
486           annotation pipelines and annotating batches of genomes. *Sci. Rep.* **2015**, *5*, 8365.
- 487   28.     Besemer, J.; Borodovsky, M. GeneMark: web software for gene finding in prokaryotes, eukaryotes and viruses.  
488           *Nucleic Acids Res.* **2005**, *33*, W451–W454.
- 489   29.     Altschul, S.F.; Gish, W.; Miller, W.; Myers, E.W.; Lipman, D.J. Basic local alignment search tool. *J. Mol. Biol.* **1990**,  
490           *215*, 403–410.
- 491   30.     Soding, J.; Biegert, A.; Lupas, A.N. The HHpred interactive server for protein homology detection and structure  
492           prediction. *Nucleic Acids Res.* **2005**, *33*, W244–W248.
- 493   31.     Finn, R.D.; Coghill, P.; Eberhardt, R.Y.; Eddy, S.R.; Mistry, J.; Mitchell, A.L.; Potter, S.C.; Punta, M.; Qureshi, M.;  
494           Sangrador-Vegas, A.; et al. The Pfam protein families database: towards a more sustainable future. *Nucleic Acids*  
495           *Res.* **2016**, *44*, D279–D285.
- 496   32.     Enrique González-Tortuero<sup>1</sup>, Thomas David Sean Sutton<sup>1</sup>, Vimalkumar Velayudhan<sup>1</sup>, 4 Andrey Nikolaevich  
497           Shkoporov<sup>1</sup>, Lorraine Anne Draper<sup>1</sup>, Stephen Robert Stockdale<sup>1</sup>, 2, Reynolds 5 Paul Ross<sup>1</sup>, 3, Colin Hill<sup>1</sup>, 3, 6  
498           VIGA: a sensitive, precise and automatic de novo Viral Genome Annotator. *bioRxiv* **2018**, 277509.
- 499   33.     Zankari, E.; Hasman, H.; Cosentino, S.; Vestergaard, M.; Rasmussen, S.; Lund, O.; Aarestrup, F.M.; Larsen, M.V.  
500           Identification of acquired antimicrobial resistance genes. *J. Antimicrob. Chemother.* **2012**, *67*, 2640–4.
- 501   34.     Kleinheinz, K.A.; Joensen, K.G.; Larsen, M.V. Applying the ResFinder and VirulenceFinder web-services for easy

502 identification of acquired antibiotic resistance and E. coli virulence genes in bacteriophage and prophage  
503 nucleotide sequences. *Bacteriophage* **2014**, 4, e27943.

504 35. Joensen, K.G.; Scheutz, F.; Lund, O.; Hasman, H.; Kaas, R.S.; Nielsen, E.M.; Aarestrup, F.M. Real-Time Whole-  
505 Genome Sequencing for Routine Typing, Surveillance, and Outbreak Detection of Verotoxigenic Escherichia coli.  
506 *J. Clin. Microbiol.* **2014**, 52, 1501–1510.

507 36. Roberts, R.J.; Vincze, T.; Posfai, J.; Macelis, D. REBASE—a database for DNA restriction and modification:  
508 enzymes, genes and genomes. *Nucleic Acids Res.* **2015**, 43, D298–D299.

509 37. Kieft, K.; Zhou, Z.; Anantharaman, K. VIBRANT: Automated recovery, annotation and curation of microbial  
510 viruses, and evaluation of virome function from genomic sequences. *bioRxiv* **2019**, 855387.

511 38. Adriaenssens, E.; Brister, J.R. How to Name and Classify Your Phage: An Informal Guide. *Viruses* **2017**, 9.

512 39. Ågren, J.; Sundström, A.; Håfström, T.; Segerman, B. Gegenees: Fragmented Alignment of Multiple Genomes for  
513 Determining Phylogenomic Distances and Genetic Signatures Unique for Specified Target Groups. *PLoS One*  
514 **2012**, 7, e39107.

515 40. Kumar, S.; Stecher, G.; Tamura, K. MEGA7: Molecular Evolutionary Genetics Analysis Version 7.0 for Bigger  
516 Datasets. *Mol. Biol. Evol.* **2016**, 33, 1870–1874.

517 41. Lopes, A.; Tavares, P.; Petit, M.-A.; Guérois, R.; Zinn-Justin, S. Automated classification of tailed bacteriophages  
518 according to their neck organization. *BMC Genomics* **2014**, 15, 1027.

519 42. Mercanti, D.J.; Rousseau, G.M.; Capra, M.L.; Quiberoni, A.; Tremblay, D.M.; Labrie, S.J.; Moineau, S. Genomic  
520 Diversity of Phages Infecting Probiotic Strains of Lactobacillus paracasei. *Appl. Environ. Microbiol.* **2016**, 82, 95–  
521 105.

- 522 43. Edgar, R.C. MUSCLE: multiple sequence alignment with high accuracy and high throughput. *Nucleic Acids Res.*  
523 **2004**, 32, 1792–7.
- 524 44. Tamura, K.; Nei, M. Estimation of the number of nucleotide substitutions in the control region of mitochondrial  
525 DNA in humans and chimpanzees. *Mol. Biol. Evol.* **1993**, 10, 512–26.
- 526 45. Sullivan, M.J.; Petty, N.K.; Beatson, S.A. Easyfig: a genome comparison visualizer. *Bioinformatics* **2011**, 27, 1009.
- 527 46. Hsieh, T.C.; Ma, K.H.; Chao, A. iNEXT: an R package for rarefaction and extrapolation of species diversity (Hill  
528 numbers). *Methods Ecol. Evol.* **2016**, 7, 1451–1456.
- 529 47. Chao, A.; Gotelli, N.J.; Hsieh, T.C.; Sander, E.L.; Ma, K.H.; Colwell, R.K.; Ellison, A.M. Rarefaction and  
530 extrapolation with Hill numbers: A framework for sampling and estimation in species diversity studies. *Ecol.*  
531 *Monogr.* **2014**, 84, 45–67.
- 532 48. RStudio Team RStudio: Integrated Development for R. 2016.
- 533 49. Rocha, E.P.C.; Danchin, A. Base composition bias might result from competition for metabolic resources. *Trends*  
534 *Genet.* **2002**, 18, 291–294.
- 535 50. Motlagh, A.M.; Bhattacharjee, A.S.; Coutinho, F.H.; Dutilh, B.E.; Casjens, S.R.; Goel, R.K. Insights of Phage-Host  
536 Interaction in Hypersaline Ecosystem through Metagenomics Analyses. *Front. Microbiol.* **2017**, 8, 352.
- 537 51. Thomas, J.A.; Orwenyo, J.; Wang, L.-X.; Black, L.W. The Odd “RB” Phage-Identification of  
538 Arabinosylation as a New Epigenetic Modification of DNA in T4-Like Phage RB69. *Viruses* **2018**, 10.
- 539 52. Purohit, S.; Bestwick, K.; Lasser, G.W.; Rogers, C.M.; Mathews, C.K. T4 Phage-coded Dihydrofolate Reductase.  
540 **1981**, 256, 9121–9125.
- 541 53. Hutinet, G.; Kot, W.; Cui, L.; Hillebrand, R.; Balamkundu, S.; Gnanakalai, S.; Neelakandan, R.; Carstens, A.B.;

- 542 Lui, C.F.; Tremblay, D.; et al. 7-Deazaguanine modifications protect phage DNA from host restriction systems.  
543 *Nature* **2019**, 1–12.
- 544 54. Carstens, A.B.; Kot, W.; Lametsch, R.; Neve, H.; Hansen, L.H. Characterisation of a novel enterobacteria phage,  
545 CAjan, isolated from rat faeces. *Arch. Virol.* **2016**, *161*, 2219–2226.
- 546 55. Shkoporov, A.N.; Clooney, A.G.; Sutton, T.D.S.; Ryan, F.J.; Daly, K.M.; Nolan, J.A.; McDonnell, S.A.; Khokhlova,  
547 E. V.; Draper, L.A.; Forde, A.; et al. The Human Gut Virome Is Highly Diverse, Stable, and Individual Specific.  
548 *Cell Host Microbe* **2019**, *26*, 527-541.e5.
- 549 56. Tsonos, J.; Adriaenssens, E.M.; Klumpp, J.; Hernalsteens, J.-P.; Lavigne, R.; De Greve, H. Complete genome  
550 sequence of the novel Escherichia coli phage phAPEC8. *J. Virol.* **2012**, *86*, 13117–8.
- 551 57. Schwarzer, D.; Buettner, F.F.R.; Browning, C.; Nazarov, S.; Rabsch, W.; Bethe, A.; Oberbeck, A.; Bowman, V.D.;  
552 Stummeyer, K.; Mühlenhoff, M.; et al. A multivalent adsorption apparatus explains the broad host range of  
553 phage phi92: a comprehensive genomic and structural analysis. *J. Virol.* **2012**, *86*, 10384–98.
- 554 58. Schwarzer, D.; Browning, C.; Stummeyer, K.; Oberbeck, A.; Mühlenhoff, M.; Gerardy-Schahn, R.; Leiman, P.G.  
555 Structure and biochemical characterization of bacteriophage phi92 endosialidase. *Virology* **2015**, *477*, 133–143.
- 556 59. Liu, H.; Geagea, H.; Rousseau, G.M.; Labrie, S.J.; Tremblay, D.M.; Liu, X.; Moineau, S. Characterization of the  
557 Escherichia coli Virulent Myophage ST32. *Viruses* **2018**, *10*.
- 558 60. Jamalludeen, N.; Kropinski, A.M.; Johnson, R.P.; Lingohr, E.; Harel, J.; Gyles, C.L. Complete genomic sequence  
559 of bacteriophage phiEcoM-GJ1, a novel phage that has myovirus morphology and a podovirus-like RNA  
560 polymerase. *Appl. Environ. Microbiol.* **2008**, *74*, 516–25.
- 561 61. Thompson, D.W.; Casjens, S.R.; Sharma, R.; Grose, J.H. Genomic comparison of 60 completely sequenced

- 562 bacteriophages that infect *Erwinia* and/or *Pantoea* bacteria. *Virology* **2019**, 535, 59–73.
- 563 62. Born, Y.; Fieseler, L.; Marazzi, J.; Lurz, R.; Duffy, B.; Loessner, M.J. Novel Virulent and Broad-Host-Range  
564 *Erwinia amylovora* Bacteriophages Reveal a High Degree of Mosaicism and a Relationship to Enterobacteriaceae  
565 Phages. *Appl. Environ. Microbiol.* **2011**, 77, 5945–5954.
- 566 63. Lim, J.-A.; Shin, H.; Lee, D.H.; Han, S.-W.; Lee, J.-H.; Ryu, S.; Heu, S. Complete genome sequence of the  
567 *Pectobacterium carotovorum* subsp. *carotovorum* virulent bacteriophage PM1. *Arch. Virol.* **2014**, 159, 2185–2187.
- 568 64. Lavigne, R.; Seto, D.; Mahadevan, P.; Ackermann, H.-W.; Kropinski, A.M. Unifying classical and molecular  
569 taxonomic classification: analysis of the Podoviridae using BLASTP-based tools. *Res. Microbiol.* **2008**, 159, 406–  
570 414.
- 571 65. Doore, S.M.; Fane, B.A. The microviridae: Diversity, assembly, and experimental evolution. *Virology* **2016**, 491,  
572 45–55.
- 573 66. Jun, J.W.; Kim, J.H.; Shin, S.P.; Han, J.E.; Chai, J.Y.; Park, S.C. Characterization and complete genome sequence of  
574 the *Shigella* bacteriophage pSf-1. *Res. Microbiol.* **2013**, 164, 979–986.
- 575 67. Essoh, C.; Latino, L.; Midoux, C.; Blouin, Y.; Loukou, G.; Nguetta, S.-P.A.; Lathro, S.; Cablanmian, A.; Kouassi,  
576 A.K.; Vergnaud, G.; et al. Investigation of a Large Collection of *Pseudomonas aeruginosa* Bacteriophages  
577 Collected from a Single Environmental Source in Abidjan, Côte d’Ivoire. *PLoS One* **2015**, 10, e0130548.
- 578 68. Turner, D.; Wand, M.E.; Briers, Y.; Lavigne, R.; Sutton, J.M.; Reynolds, D.M. Characterisation and genome  
579 sequence of the lytic *Acinetobacter baumannii* bacteriophage vB\_AbaS\_Loki. *PLoS One* **2017**, 12, e0172303.
- 580 69. Ma, Y.; Li, E.; Qi, Z.; Li, H.; Wei, X.; Lin, W.; Zhao, R.; Jiang, A.; Yang, H.; Yin, Z.; et al. Isolation and molecular  
581 characterisation of *Achromobacter* phage phiAxp-3, an N4-like bacteriophage. *Sci. Rep.* **2016**, 6, 24776.

- 582 70. Bryan, M.J.; Burroughs, N.J.; Spence, E.M.; Clokie, M.R.J.; Mann, N.H.; Bryan, S.J. Evidence for the intense  
583 exchange of MazG in marine cyanophages by horizontal gene transfer. *PLoS One* **2008**, *3*, 1–12.
- 584 71. Lavigne, R.; Burkal'tseva, M. V; Robben, J.; Sykilinda, N.N.; Kurochkina, L.P.; Grymonprez, B.; Jonckx, B.;  
585 Krylov, V.N.; Mesyanzhinov, V. V; Volckaert, G. The genome of bacteriophage  $\phi$ KMV, a T7-like virus infecting  
586 *Pseudomonas aeruginosa*. *Virology* **2003**, *312*, 49–59.
- 587 72. Adriaenssens, E.M.; Ceyssens, P.-J.; Dunon, V.; Ackermann, H.-W.; Van Vaerenbergh, J.; Maes, M.; De Proft, M.;  
588 Lavigne, R. Bacteriophages LIMelight and LIMEzero of *Pantoea agglomerans*, belonging to the "phiKMV-  
589 like viruses". *Appl. Environ. Microbiol.* **2011**, *77*, 3443–50.
- 590 73. Ceyssens, P.-J.; Lavigne, R.; Mattheus, W.; Chibeu, A.; Hertveldt, K.; Mast, J.; Robben, J.; Volckaert, G. Genomic  
591 analysis of *Pseudomonas aeruginosa* phages LKD16 and LKA1: establishment of the phiKMV subgroup within  
592 the T7 supergroup. *J. Bacteriol.* **2006**, *188*, 6924–31.
- 593 74. Hua, Y.; An, X.; Pei, G.; Li, S.; Wang, W.; Xu, X.; Fan, H.; Huang, Y.; Zhang, Z.; Mi, Z.; et al. Characterization of  
594 the morphology and genome of an *Escherichia coli* podovirus. *Arch. Virol.* **2014**, *159*, 3249–3256.
- 595 75. Sváb, D.; Falgenhauer, L.; Rohde, M.; Chakraborty, T.; Tóth, I. Complete genome sequence of C130\_2, a novel  
596 myovirus infecting pathogenic *Escherichia coli* and *Shigella* strains. *Arch. Virol.* **2019**, *164*, 321–324.
- 597 76. Bandyopadhyay, K.; Parua, P.K.; Datta, A.B.; Parrack, P. *Escherichia coli* HflK and HflC can individually inhibit  
598 the HflB (FtsH)-mediated proteolysis of  $\lambda$ CII in vitro. *Arch. Biochem. Biophys.* **2010**, *501*, 239–243.

599

600

# SUPPLEMENTARY FIGURES AND TABLES

## Figure S1 *Microviridae*

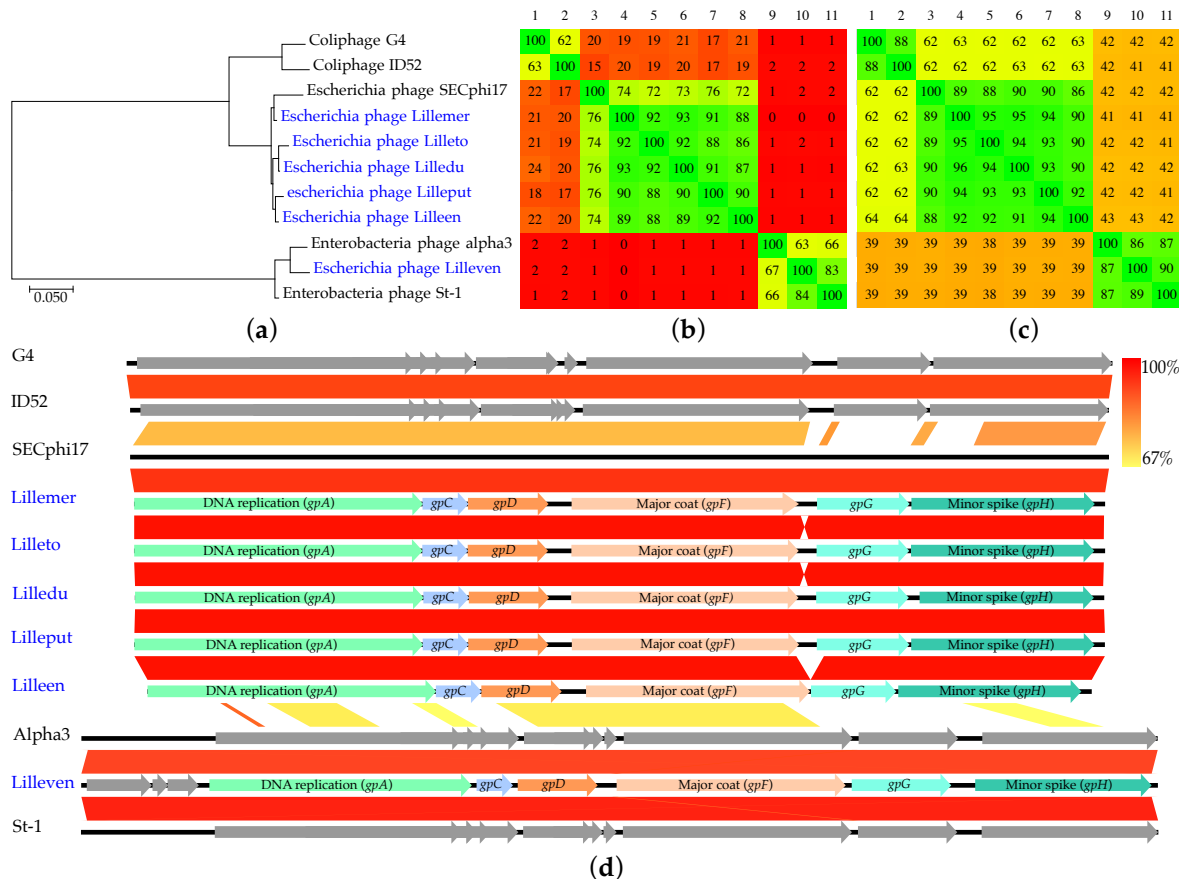

**Figure S4** (a) Phylogenetic tree (Maximum log Likelihood: -6065.3, DNA replication protein *gpA*), scalebar: substitutions per site (b) Phylogenomic nucleotide distances (Gegenees, BLASTn: fragment size: 200, step size: 100, threshold: 0%). (c) Phylogenomic amino acid distances (Gegenees, tBLASTx: fragment size: 200, and step size: 100, threshold: 0%). (d) Pairwise alignment of phage genomes, the colour bars between genomes indicate percent pairwise similarity as illustrated by the colour bar in the upper right corner (Easyfig, BLASTn). Gene annotations are provided for phages identified in this study and deposited in GenBank.

Figure S2 *Hanrivervirus*

|                   | 1   | 2   | 3   | 4   | 5   | 6   | 7   | 8   | 9   |
|-------------------|-----|-----|-----|-----|-----|-----|-----|-----|-----|
| 1 <i>Damhaus</i>  | 100 | 84  | 85  | 85  | 88  | 79  | 81  | 85  | 83  |
| 2 <i>Herni</i>    | 84  | 100 | 86  | 86  | 85  | 82  | 80  | 90  | 85  |
| 3 <i>Grams</i>    | 87  | 88  | 100 | 86  | 88  | 81  | 82  | 87  | 84  |
| 4 <i>Vojen</i>    | 85  | 86  | 84  | 100 | 84  | 81  | 82  | 89  | 85  |
| 5 <i>Aaroes</i>   | 88  | 84  | 85  | 83  | 100 | 79  | 80  | 84  | 81  |
| 6 <i>Aalborg</i>  | 85  | 88  | 85  | 87  | 86  | 100 | 83  | 86  | 84  |
| 7 <i>Haarsle</i>  | 85  | 84  | 83  | 84  | 84  | 80  | 100 | 86  | 84  |
| 8 <i>Egaa</i>     | 85  | 89  | 84  | 87  | 84  | 79  | 82  | 100 | 85  |
| 9 <i>Shigella</i> | 82  | 84  | 81  | 84  | 81  | 77  | 80  | 85  | 100 |

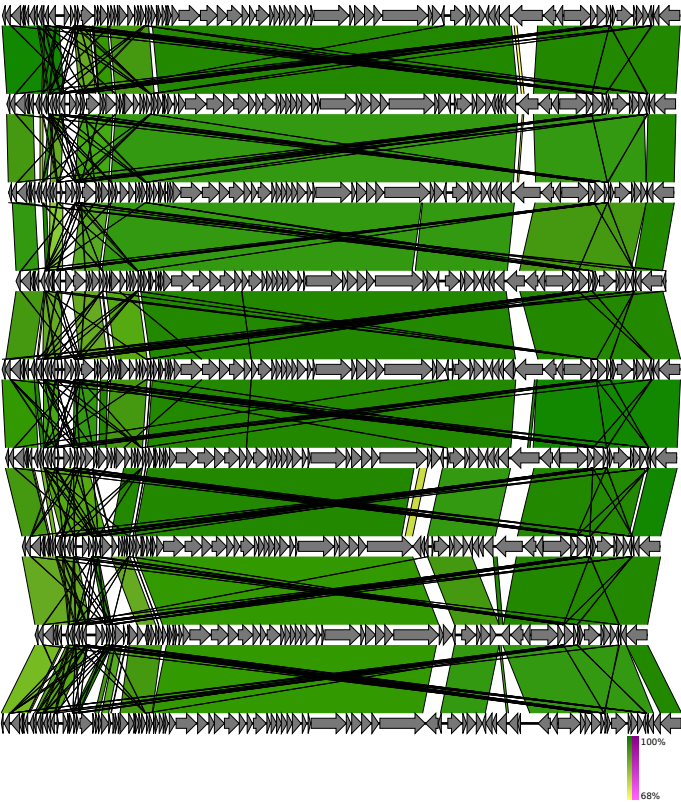

**Figure S2** Phylogenomic amino acid distances (Gegenees, tBLASTx: fragment size: 200, and step size: 100, threshold: 0%). and Pairwise alignment of phage genomes (Easyfig, BLASTn), the colour bars between genomes indicate percent pairwise similarity as illustrated by the colour bar in the lower right corner (Easyfig, BLASTn). Genome order is the same in both analyses.

618 Figure S3 *Dhillonvirus*

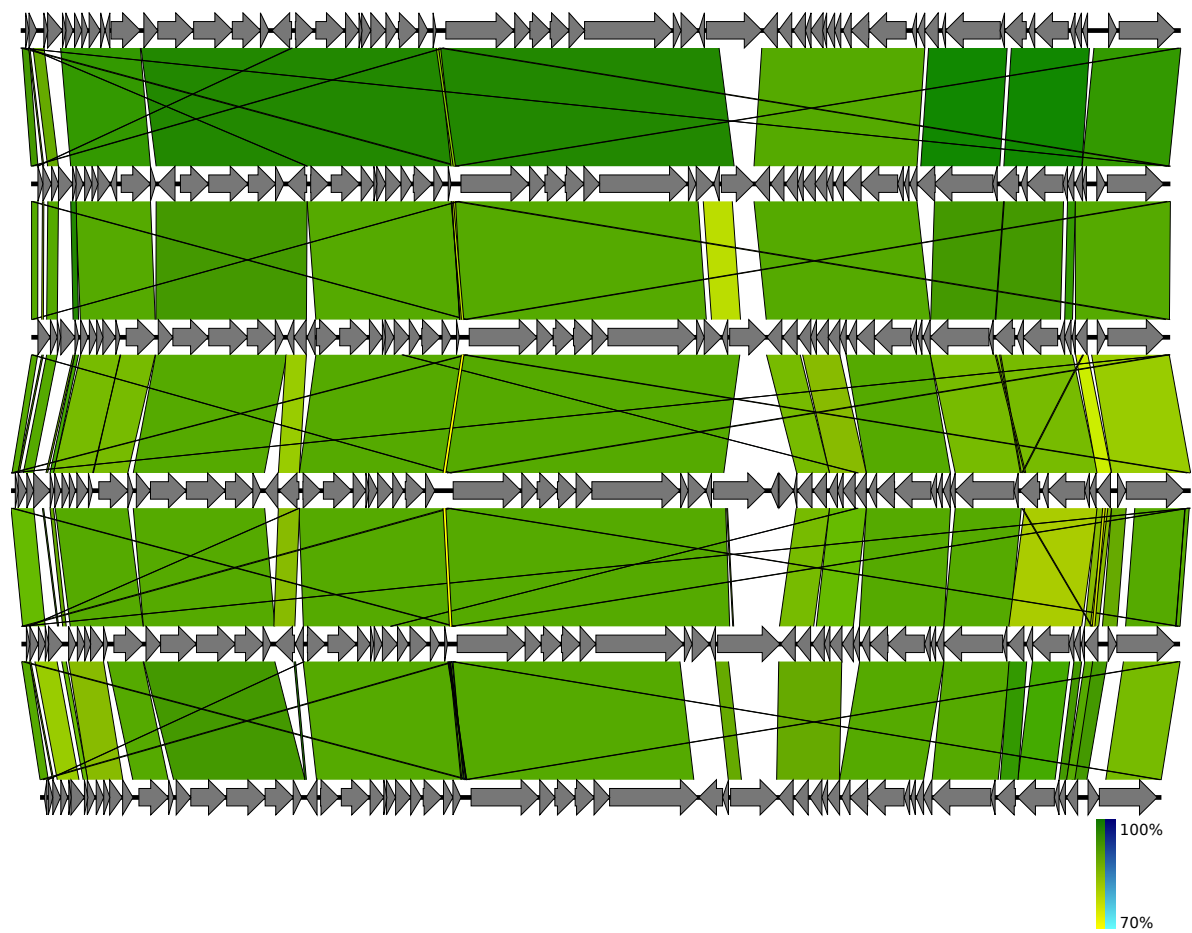

**Figure S3** Pairwise alignment of phage genomes (Easyfig, BLASTn), the colour bars between genomes indicate percent pairwise similarity as illustrated by the colour bar in the lower right corner (Easyfig, BLASTn).

623 Table S1 Auxiliary metabolism genes

624

| Gene         | Protein                                             | KO number | Function in bacteriophages                                                 | Count | phages with this gene                                                                     |
|--------------|-----------------------------------------------------|-----------|----------------------------------------------------------------------------|-------|-------------------------------------------------------------------------------------------|
| <i>rmlC</i>  | dTDP-4-dehydorrhamnose 3,5-epimerase                | K01790    | dtdp rhamnose biosynthesis                                                 | 10    | <i>Cluster VI and VII</i>                                                                 |
| <i>rmlA</i>  | glucose-1-phosphate thymidyltransferase             | K00973    | dtdp rhamnose biosynthesis                                                 | 8     | <i>Cluster VII, ukendt and tuntematon</i>                                                 |
| <i>rmlB</i>  | dTDP-glucose 4,6-dehydratase                        | K01710    | dtdp rhamnose biosynthesis                                                 | 8     | <i>Cluster VII, ukendt and tuntematon</i>                                                 |
| <i>rmlD</i>  | dTDP-4-dehydorrhamnose reductase                    | K00067    | dtdp rhamnose biosynthesis                                                 | 10    | <i>Cluster VI and VII</i>                                                                 |
| <i>dcm</i>   | DNA (cytosine-5)-methyltransferase                  | K17398    | DNA modification                                                           | 5     | <i>Cluster VII</i>                                                                        |
| NAMPT        | nicotinamide phosphoribosyltransferase              | K03462    | unknown                                                                    | 25    | <i>Felixounavirus, Suspvirus and Cluster VII</i>                                          |
| <i>mec</i>   | CysO sulfur-carrier protein]-S-L-cysteine hydrolase | K21140    | tail fiber protein                                                         | 20    | <i>Hanriverovirus and unclassified Tunavirinae</i>                                        |
| <i>folA</i>  | dihydrofolate reductase                             | K00287    | de novo synthesis of pyrimidines, thymidylic acid, and certain amino acids | 33    | <i>Felixounavirus, Suspvirus, Krischovirus, Dhakavirus, Mosigovirus and Tequatrovirus</i> |
| <i>aroAG</i> | 3-deoxy-7-phosphoheptulonate synthase               | K01626    | unknown                                                                    | 3     | <i>Three of the four Mosigovirus</i>                                                      |
| <i>AUP1</i>  | UDP-N-acetylglucosamine diphosphorylase             | K23144    | DNA modification                                                           | 4     | <i>Mosigovirus</i>                                                                        |
| <i>KdsD</i>  | arabinose-5-phosphate isomerase                     | K06041    | DNA modification                                                           | 4     | <i>Mosigovirus</i>                                                                        |
| <i>dcm</i>   | DNA (cytosine-5)-methyltransferase                  | K00558    | DNA modification                                                           | 1     | <i>Pangalan</i>                                                                           |
| <i>queC</i>  | 7-cyano-7-deazaguanine synthase                     | K06920    | DNA modification                                                           | 1     | <i>Skure</i>                                                                              |
| <i>queE</i>  | 7-carboxy-7-deazaguanine synthase                   | K10026    | DNA modification                                                           | 1     | <i>Skure</i>                                                                              |
| <i>folE</i>  | GTP cyclohydrolase                                  | K01495    | DNA modification                                                           | 1     | <i>Skure</i>                                                                              |
| <i>queD</i>  | 6-carboxy-5,6,7,8-tetrahydropterin synthase         | K01737    | DNA modification                                                           | 1     | <i>Skure</i>                                                                              |

625
